# Supplementary material
Source: PubMed Central journal article supplement (PMC4314462)
Supplement: NIHMS653244-supplement-01.pdf [file NIHMS653244-supplement-01.pdf]

## WEBAPPENDIX:

### Global burden of cancer attributable to excess body mass index in 2012

Melina Arnold PhD\*, Nirmala Pandeya PhD\*, Graham Byrnes PhD, Prof Andrew G Renehan PhD, Gretchen A Stevens DSc, Prof Majid Ezzati FMedSci, Jacques Ferlay MSc, J. Jaime Miranda PhD, Isabelle Romieu PhD, Rajesh Dikshit PhD, David Forman PhD, Isabelle Soerjomataram PhD.

\* contributed equally to the paper

#### Table of Contents

|       |                                                                                                                                          |    |
|-------|------------------------------------------------------------------------------------------------------------------------------------------|----|
| i.    | Inputs I: Finding the best distribution for Body Mass Index .....                                                                        | 2  |
| ii.   | Inputs II: Relative Risks .....                                                                                                          | 8  |
| iii.  | Inputs III: Cancer data .....                                                                                                            | 10 |
| iv.   | Statistical methods for PAF .....                                                                                                        | 11 |
| v.    | Statistical methods for uncertainty analysis .....                                                                                       | 12 |
| vi.   | Estimating Population Attributable Fraction: Categorical versus continuous Body Mass Index... ..                                         | 13 |
| vii.  | Estimating Population Attributable Fraction: Changing distribution of body mass index .....                                              | 15 |
| viii. | Estimating Population Attributable Fraction: Changing the shape of the relative risk... ..                                               | 17 |
| ix.   | Estimating Population Attributable Fraction: Global relative risk versus region-specific relative risk                                   | 20 |
| x.    | Adjusting Population Attributable Fraction: effect modifier and confounder .....                                                         | 24 |
|       | <i>a. Confounding: Smoking, body mass index and pancreatic cancer .....</i>                                                              | 24 |
|       | <i>b. Effect modification: Hormonal Replacement Therapy (HRT) and cancer of the corpus uteri and postmenopausal breast .....</i>         | 26 |
| xi.   | Adding cancer sites to the obesity-related cancers: Impact of thyroid cancer, non-Hodgkin lymphoma and premenopausal breast cancer ..... | 28 |
| xii.  | Counterfactual scenario : Maintaining the 1982 BMI.....                                                                                  | 31 |
| xiii. | Number of new cancer cases and proportion of the new cases attributable to excess body mass index by country and sex.....                | 34 |
|       | References .....                                                                                                                         | 41 |

## **i. Inputs I: Finding the best distribution for Body Mass Index**

This study used the estimated BMI reported by Global Burden of Metabolic Risk Factors of Chronic Diseases Collaborating Group (GBMRF). The details of the applied model and its assumptions in estimating mean BMI have been published elsewhere.<sup>1</sup> In summary, GBMRF global estimates were obtained using the systematic analysis of published and unpublished data from health examination surveys and epidemiological studies identified through a systematic review of the literature, the WHO Global Infobase and data and studies known to the investigators.<sup>1</sup> BMI was estimated using only measured (not self-reported) height and weight from the surveys. Estimates of mean BMI by age, sex, country and calendar year were obtained using a Bayesian hierarchical model, systematically addressing issues such as missing data and studies that were only representative of a subnational population.<sup>2</sup>

With the observed increase in BMI in the past few decades<sup>2</sup>, the population distribution of BMI has shifted slowly with a stretched right tail suggesting log-normal to be a better fitting distribution.<sup>3</sup> This was confirmed after we scrutinized several publicly available databases containing unit level BMI collected from various population-based surveys worldwide. Based on this assumption, we used country, age and sex specific mean and standard deviation of BMI from the GBMRF database to estimate continuous BMI distributions and used this as input in the analysis.

To calculate PAF of cancer related to body mass index (BMI), we required (1) prevalence of BMI including mean and standard deviation and (2) relative risk (RR). In order to select the parametric family of distributions to be fitted to the summary statistics available for the various populations considered, we obtained publicly available unit BMI data from various databases. The individual measurements of BMI were available in the Survey of Health, Aging and Retirement in Europe (SHARE), the National Health and Nutrition Examination Survey (NHANES) and the Health survey for England, representing populations from Europe, the USA and the UK respectively. Data on BMI were obtained from the Demographic and Health Survey (DHS) for women from countries in less developed regions. Collectively these databases covered countries in all regions of the world. We selected 25 countries that represented the world regions that we studied in the main manuscript namely: (1) 12 in Europe, (2) 7 in Asia, (3) 2 in Africa, (4) 2 in Latin America, (5) 1 in North America, and (6) 1 in Oceania.

Figure 1 illustrates QQ-plots of BMI in 25 countries, using the normal and the lognormal distribution. For all the countries shown below the population BMI has a right-skewed distribution. The normal QQ-plots show a higher distance between the normal theoretical quantiles (y-axis) and the population BMI (x-axis) at the lower and upper extremes of the distribution. In contrast, the lognormal QQ-plots better explain the population BMI density for all countries. Based on the distribution of BMI observed for these countries we concluded that a log normal distribution was a better fit for BMI distribution than a normal distribution.

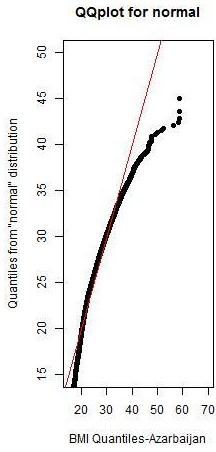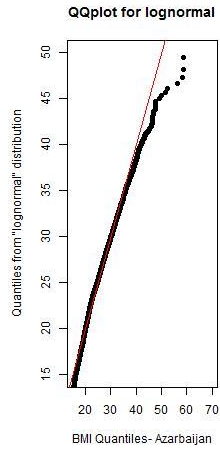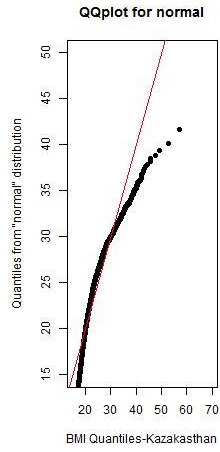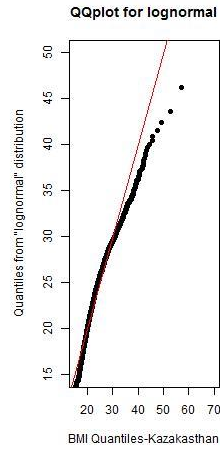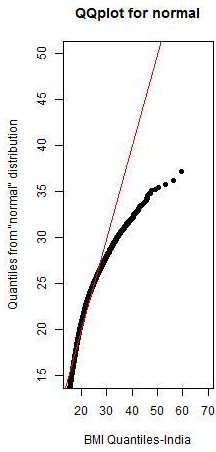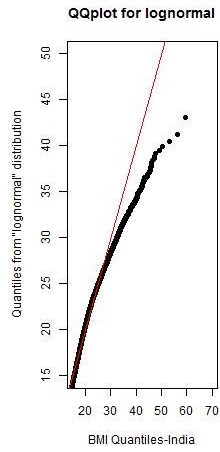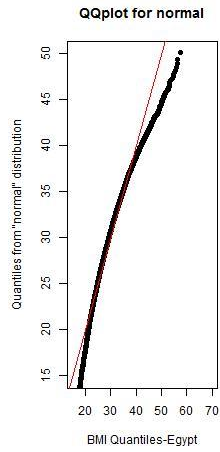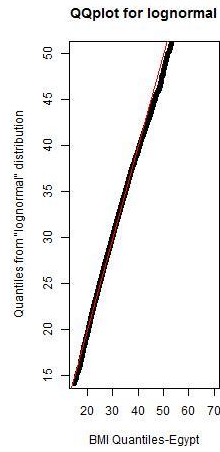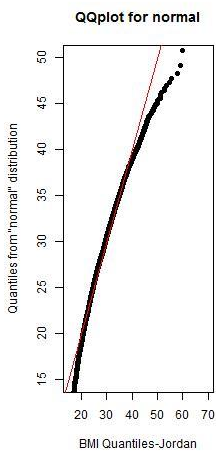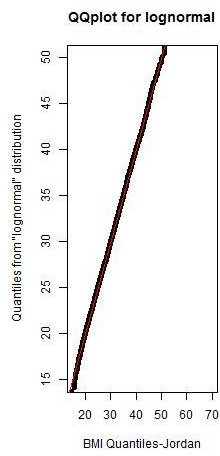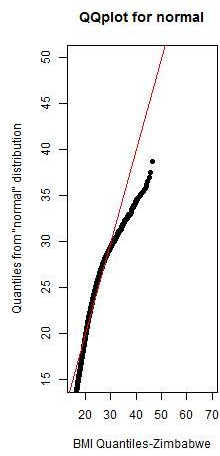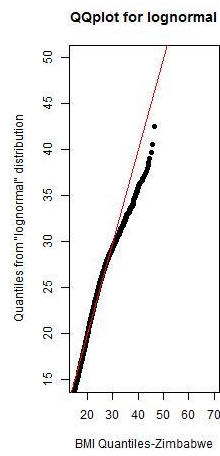

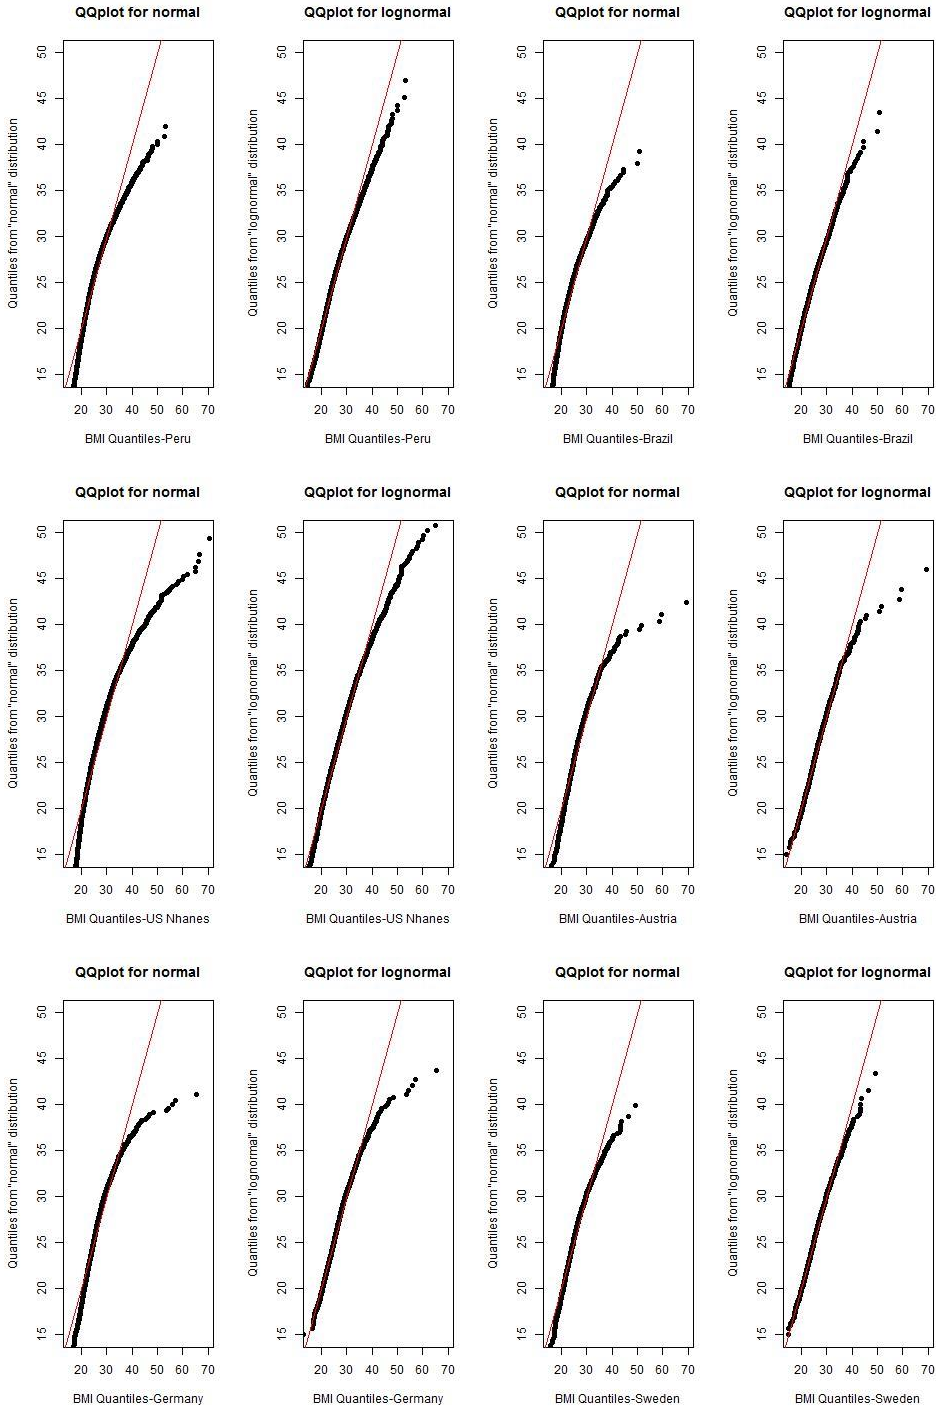

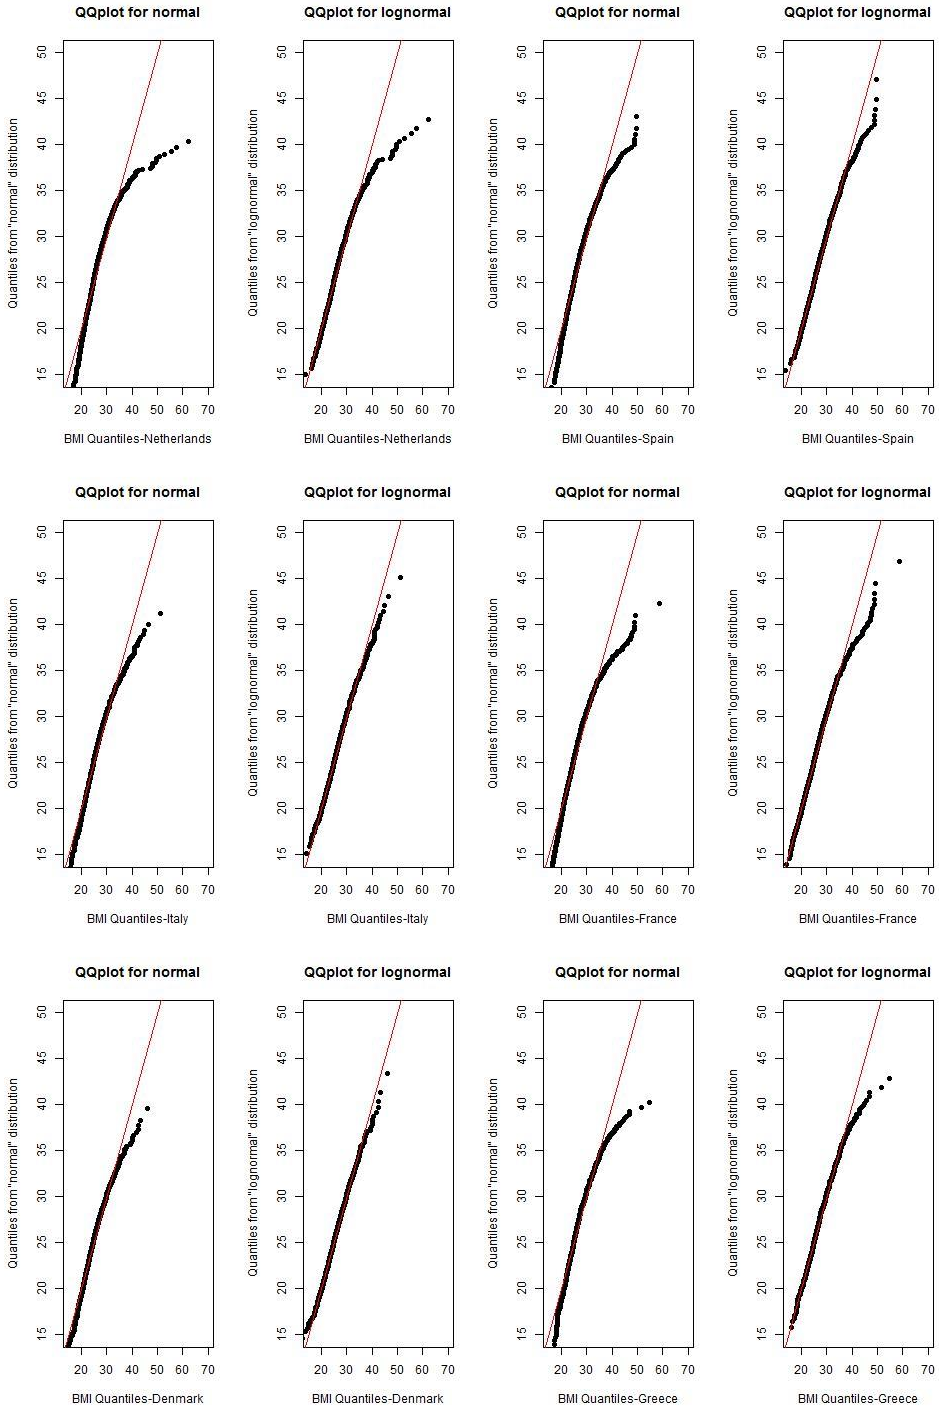

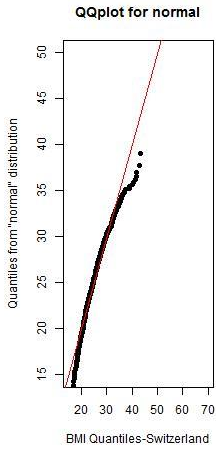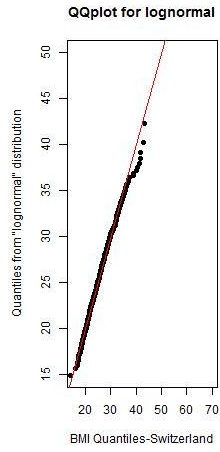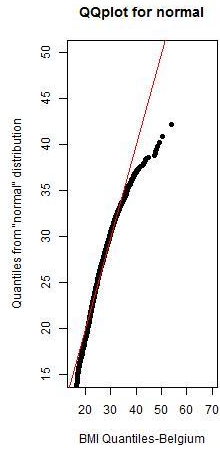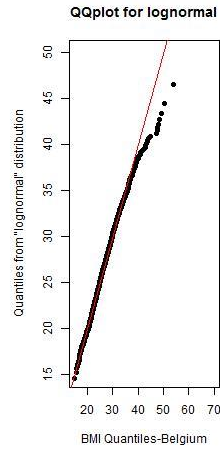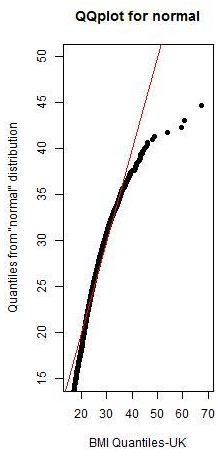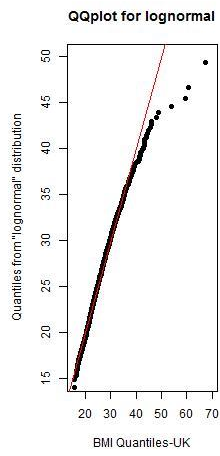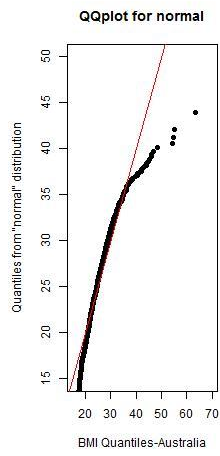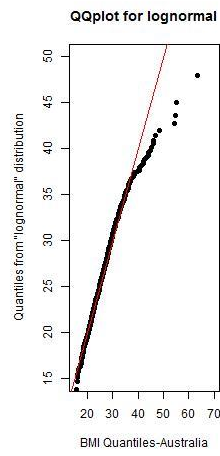

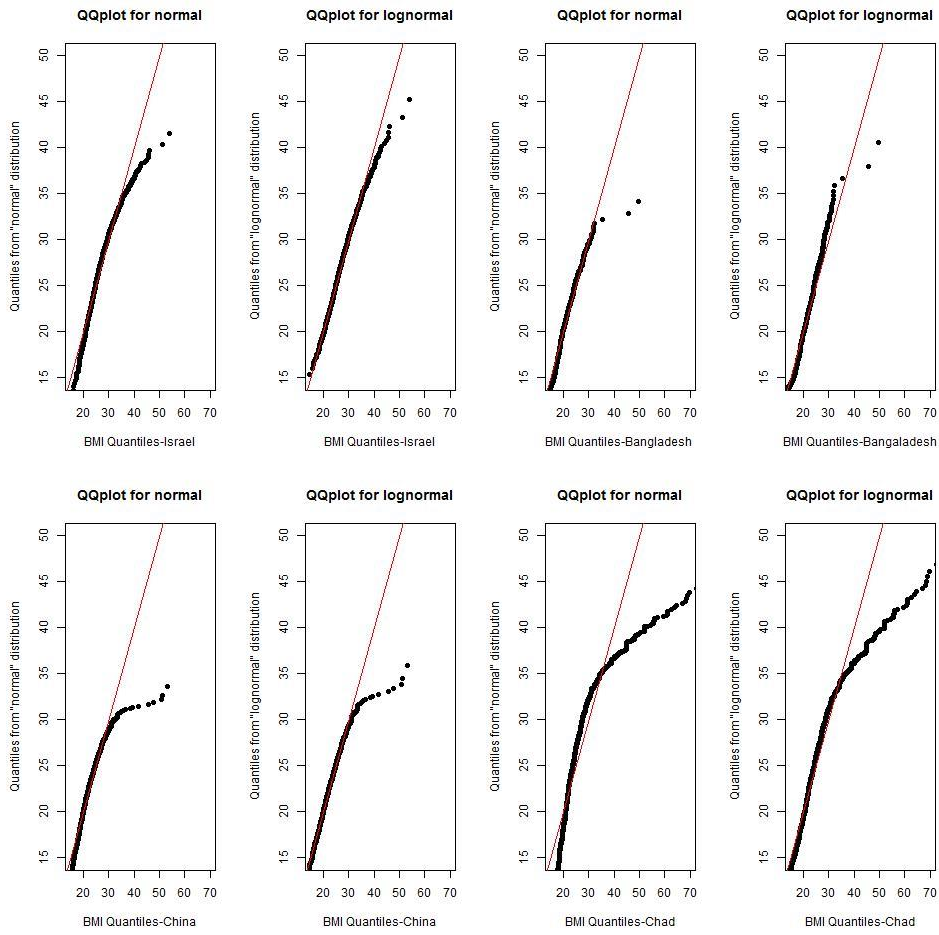

**Figure 1. QQ-plots of body mass index in 25 countries comparing plots for normal (left panel) with lognormal density (right panel)**

## ii. Inputs II: Relative Risks

Only cancers suggested by the World Cancer Research Fund (WCRF) as having sufficient evidence to be associated with excess BMI were included in the primary analysis.<sup>4-8</sup> These include oesophageal adenocarcinoma, and colon, rectal, kidney, pancreatic, gallbladder, postmenopausal breast, corpus uteri and ovarian cancers, (referred to as obesity-related cancers from here onward). Our secondary analysis included additional cancer sites that have recently been suggested to be associated with excess BMI but were not listed by WCRF as sufficient.

Given the differences in risk of colon and rectal cancer associated with obesity, PAF was estimated separately for the two sites. Similarly, only adenocarcinomas of the oesophagus were included because of lack of association between excess BMI and oesophageal squamous cell carcinoma. The sex-specific relative risks (RR) for the sites included in the analysis were obtained from the published standardized meta-analysis estimates by Renehan et al.<sup>9</sup> and the WCRF Continuous Update Project (CUP). In these meta-analyses, risk estimates were pooled from cohort studies and also for studies that have used cancer incidence as outcome i.e. excluding mortality from cancer (Table 1).

Our primary approach in this study was to include only cancer sites reported by WCRF as being convincingly associated with excess BMI. For the relative risks, however, we decided to only rely on the most comprehensive, including mainly cohort studies and updated estimates available from the literature using the same source for males and females, which is the Renehan review published in the Lancet (search up to November 2007) alongside the WCRF estimates resulting from the Continuous Update project (updates of the Second Expert Report, searches from January 2006 until most recent). To test the impact of adding emerging new cancer sites, we included two additional cancer sites (thyroid cancer and Non-Hodgkin Lymphoma) which were not included in the WCRF list of cancers with a convincing or probable link with excess BMI in the sensitivity analysis (appendix xi). As for gallbladder cancer, the evidence for males was unclear in the WCRF report and statistically non-significant in the Renehan review, therefore we decided not to include this site for males.

**Table 1. List of cancers associated with excess body mass index in this study and their relative risks (RR).**

| Cancer site<br>(ICD-10)                        | RR (per 5kg/m <sup>2</sup> )* |                  |
|------------------------------------------------|-------------------------------|------------------|
|                                                | Men                           | Women            |
| Oesophagus (adenocarcinoma) (C15) <sup>9</sup> | 1.52 (1.33-1.74)              | 1.51 (1.31-1.74) |
| Colon (C18) <sup>8</sup>                       | 1.20 (1.18-1.25)              | 1.10 (1.05-1.15) |
| Rectum (C20) <sup>8</sup>                      | 1.10 (1.05-1.10)              | 1.05 (1.00-1.10) |
| Gallbladder (C23) <sup>9</sup>                 | NS                            | 1.59 (1.02-2.47) |
| Pancreas (C25) <sup>7</sup>                    | 1.13 (1.04-1.22)              | 1.10 (1.04-1.16) |
| Breast (C50) <sup>6</sup> (postmenopausal)     | -                             | 1.13 (1.08-1.18) |
| Corpus Uteri (C54) <sup>5</sup>                | -                             | 1.50 (1.42-1.59) |
| Ovary (C56) <sup>4</sup>                       | -                             | 1.06 (1.02-1.11) |
| Kidney (C64) <sup>9</sup>                      | 1.24 (1.15-1.34)              | 1.34 (1.25-1.43) |

NS: No statistically significant association reported hence not included in PAF calculation

\*RRs were transformed to per-unit-increase in BMI using linear interpolation

### *Relative Risk function*

Being derived from a log-linear model, the default choice for a function of RR estimates in its continuous form for higher order exposures is a log-linear function. The log-linear function however results in a steeply increasing RR at the right tail of the distribution, predicting unreasonably large number of cancer cases attributed to high BMI at the extreme ends, despite both the exposure and the RR being poorly estimated at these extreme values. To mitigate this effect, we used the log-logit function for RR, where the shape of the RR function is similar to that of log-linear but with a less abrupt rise at the extreme values. Furthermore, since RR estimates beyond these points were scant, no risk for BMI below 22 and flat RRs above 40 were assumed. A pictorial illustration of these assumptions is presented in Figure 2. In appendix



viii, we tested the influence of the different RR functions on the final PAF estimates, resulting in only very subtle differences when using the log-linear compared to the log-logit RR function.

For the primary analysis, global risk estimates (relative risk: RR) were applied uniformly across all age groups with the exception of breast cancer, where RR was only applied for women above age 50 (assumed as postmenopausal age). Due to broad consistencies in RRs across geographic populations for cancers included in the primary analysis of this study (namely, North American, European and Australian, and Asian-Pacific),<sup>9,10</sup> we thereby assumed no variations in the RR across geographic regions. Difference of the final estimates to those if regional-specific RR was used is presented in appendix vii.

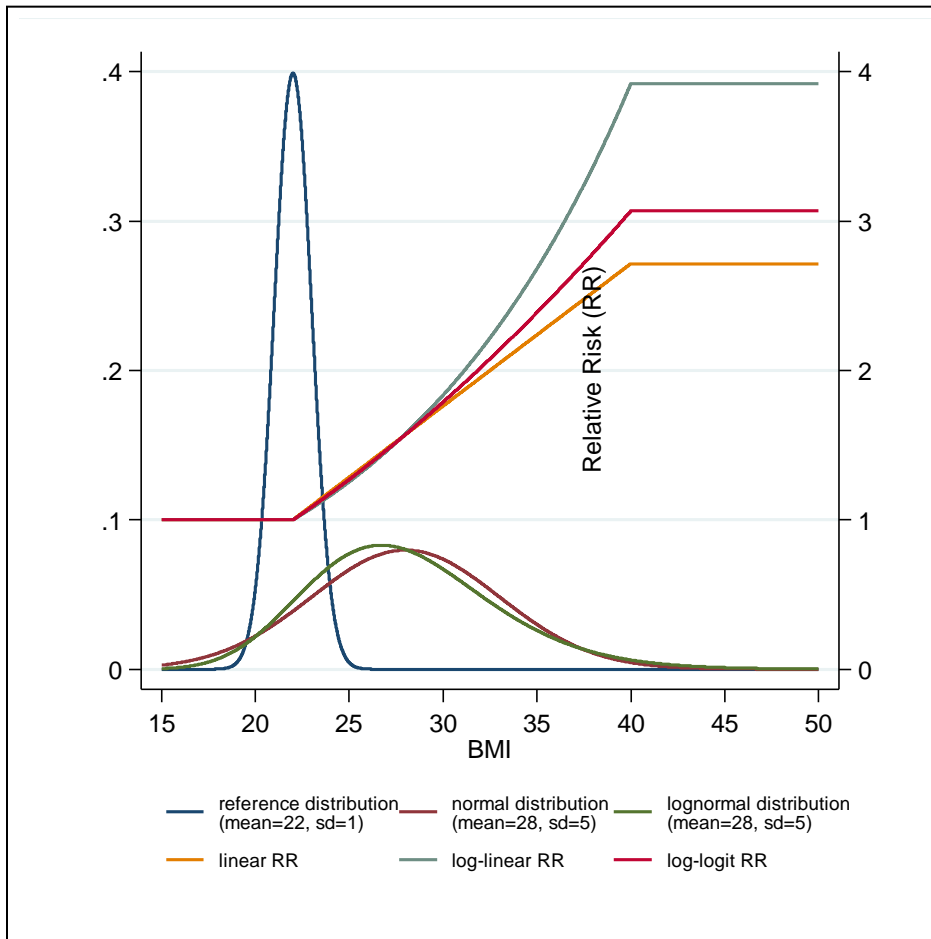

**Figure 2. Normal (in dark red) and equivalent log normal (in green) distribution for the population body mass index. Distribution of the reference population in blue. Linear (in orange), log-logit (in red) and log-linear (light green) function for the corresponding relative risk.**

### iii. Inputs III: Cancer data

As the incidence of colon and rectal cancers (separately) and oesophageal cancer by histological subtypes are not reported in GLOBOCAN<sup>11</sup>, the number of cancers by subtypes were estimated based on country- and sex-specific proportions reported in Cancer Incidence in Five Continents volume X (CI5 X).<sup>12</sup> For oesophageal adenocarcinomas also age-specific (<65; ≥ 65 years) proportions were estimated by dividing the number of adenocarcinomas by the sum of all carcinomas of the oesophagus.<sup>13</sup> Cancer registries with zero cases in one of our four substrata (male/female; <65, ≥65 years) were excluded. Data from regional cancer registries were aggregated to obtain national proportions. For countries without data in CI5 X, we calculated proportions for 9 broad regions derived from the same registry data used for the GLOBOCAN 2012 project. The total number of incident cancers by subtype was then calculated by multiplying these proportions with the total incidence reported in GLOBOCAN 2012.

#### iv. Statistical methods for PAF

The following formula was used to compute the PAF:

$$\text{PAF} = \frac{\int \text{RR}(x)P(x)dx - \int \text{RR}(x)P^*(x)dx}{\int \text{RR}(x)P(x)dx}$$

Where  $P(x)$  is the population distribution of BMI,  $P^*(x)$  is the distribution of theoretical minimum BMI and  $\text{RR}(x)$  the relative risk of cancer associated with BMI at level  $x$ . The theoretical minimum distribution of BMI was defined as a BMI distribution with a mean of  $22 \text{ kg/m}^2$  and a standard deviation of 1, where the disease burden is assumed to be lowest at the population level.<sup>14</sup>

##### *Estimation of global and regional PAF*

First, age-, sex- and country-specific PAFs were calculated for individual obesity- related cancer sites. The number of cancer cases attributable to excess BMI was then derived by multiplying age-, sex-, country-, and cancer-specific PAFs by the corresponding incident cancers in 2012. Overall country, region and global estimates of the total attributable proportion of cancer related to excess BMI were calculated by summing up the number of attributable incident cases and dividing them by the total number of cancer cases in each subgroup.

## v. Statistical methods for uncertainty analysis

We attempted to account for uncertainty arising from three different sources:

1. The form of relationship between BMI and excess risk (linear, log-linear or power-law);
2. The size of the effect, measured in  $\log(\text{OR})/\text{unit of BMI}$ . Since under some models this will be a function of BMI, we adjusted the parameters to achieve the same slope at a reference BMI of 25;
3. The population distribution of BMI. We considered both normal and log-normal distributions, with uncertainty of the parameter values taken from posterior distributions, as discussed in more detail below.

The categorical choices (response relationships, distribution families) were treated as sensitivity analysis: it was found that the results varied very little compared with the uncertainties arising from the uncertainties in the parameter values. For the parameters we used a Monte Carlo approach, in which the uncertainties of odds-ratios were independent between different cancer sites, but applied equally across all countries. For the population distributions of BMI, we preferred to use log-normal distributions as they appeared to be a slightly better fit where detailed data was available (and the difference was small). The population mean and SD values from Ezzati were therefore mapped to the log-scale and shape parameters of the log-normal distribution which would result in the correct mean and SD.

Accounting for the correlation of the uncertainties in these population distribution parameters was the most complex task. Although we could have drawn the means directly from the list of draws provided, we observed that these were consistent with having been drawn from a multivariate normal distribution, independent between countries and between genders in each country, but with strong correlations between age groups within country and gender. Hence it was more computationally convenient to generate draws directly from these multivariate normal distributions, using the covariance structures estimated from the posterior draws.

It was also necessary to account for the population standard deviations and their relationship with the means. We found that these were highly correlated with the population means (median correlations above 95%) and in fact all appeared to have been generated as

$\text{SD} = A + 0.274 \times \text{Mean} + C \times (-B + \delta) + \varepsilon$ , where  $\delta$  and  $\varepsilon$  are a normally distributed random noise, A and B are positive constants and C indicates that the country is included in a list of 31 (in year 2000) or 32 (year 2009) countries where the mean SD is lower but with less variability.

Note that this relationship between mean and SD is consistent with a family of log-normal distributions with equal shape parameter and varying log-scale  $\sigma=0.7$ , supporting our observation of approximately log-normally distributed population BMI.

Using this approach, five hundred estimates of PAF by age, sex, country and cancer site were generated. Finally, 90% uncertainty limits were derived from the resulting PAF estimates.

**vi. Estimating Population Attributable Fraction: Categorical versus continuous Body Mass Index**

So far, the conventional approach when calculating the PAF was to use categorized exposure information. This however leads to a substantial loss of information as compared to using the full exposure distribution. In order to compare our results to those of earlier studies and to assess the difference between the conventional, categorical approach to the continuous approach, we recalculated the PAF using categorized BMI information. We calculated the proportions of overweight and obese population based on the lognormal distribution and calculated the PAF using the methods suggested by Hanley.<sup>15</sup>

Using categorical BMI information resulted in very similar PAF when compared to using continuous BMI data (Table 2).

**Table 2. Population attributable fraction (PAF) using categorical body mass index (BMI) and difference (PAF Δ)\* compared with the main results (Table 1a for males and 1b for females)**

\*PAF Δ= PAF main analysis – PAF sensitivity analysis

**MALES**

| region                          | Oesophageal adenocarcinoma |       | Colon |       | Rectum |       | Pancreas |       | Kidney |       |
|---------------------------------|----------------------------|-------|-------|-------|--------|-------|----------|-------|--------|-------|
|                                 | PAF                        | PAF Δ | PAF   | PAF Δ | PAF    | PAF Δ | PAF      | PAF Δ | PAF    | PAF Δ |
| sub-Saharan Africa              | 15%                        | 0%    | 5%    | -1%   | 7%     | -1%   | 6%       | -1%   | 3%     | 0%    |
| Middle East and Northern Africa | 33%                        | 1%    | 12%   | -1%   | 21%    | -1%   | 18%      | -1%   | 9%     | -1%   |
| Latin America & Caribbean       | 34%                        | 1%    | 11%   | -1%   | 20%    | -1%   | 17%      | -1%   | 9%     | -1%   |
| North America                   | 46%                        | -2%   | 16%   | -2%   | 27%    | -2%   | 23%      | -2%   | 13%    | -2%   |
| East Asia                       | 17%                        | 1%    | 5%    | 0%    | 9%     | 0%    | 7%       | 0%    | 4%     | 0%    |
| South-East Asia                 | 14%                        | 0%    | 3%    | 0%    | 6%     | -1%   | 5%       | -1%   | 2%     | 0%    |
| South-Central Asia              | 10%                        | 0%    | 3%    | -1%   | 6%     | -1%   | 5%       | -1%   | 2%     | 0%    |
| Eastern Europe                  | 37%                        | 2%    | 12%   | -1%   | 20%    | -1%   | 17%      | -1%   | 9%     | -1%   |
| Northern Europe                 | 42%                        | 2%    | 14%   | -2%   | 23%    | -2%   | 20%      | -2%   | 11%    | -1%   |
| Southern Europe                 | 41%                        | 2%    | 14%   | -2%   | 23%    | -2%   | 20%      | -2%   | 11%    | -1%   |
| Western Europe                  | 41%                        | 2%    | 14%   | -2%   | 23%    | -2%   | 21%      | -2%   | 11%    | -2%   |
| Oceania                         | 43%                        | 2%    | 15%   | -2%   | 24%    | -2%   | 21%      | -2%   | 11%    | -2%   |

**FEMALES**

| region                          | Oesophageal adenocarcinoma |       | Gallbladder |       | Pancreas |       | Corpus uteri |       | Ovary |       | Kidney |       | Colon |       | Rectum |       | Breast (postmenopausal) |       |
|---------------------------------|----------------------------|-------|-------------|-------|----------|-------|--------------|-------|-------|-------|--------|-------|-------|-------|--------|-------|-------------------------|-------|
|                                 | PAF                        | PAF Δ | PAF         | PAF Δ | PAF      | PAF Δ | PAF          | PAF Δ | PAF   | PAF Δ | PAF    | PAF Δ | PAF   | PAF Δ | PAF    | PAF Δ | PAF                     | PAF Δ |
| sub-Saharan Africa              | 26%                        | 1%    | 20%         | 1%    | 7%       | -1%   | 27%          | -2%   | 3%    | 0%    | 12%    | -1%   | 6%    | -1%   | 3%     | 0%    | 7%                      | -1%   |
| Middle East and Northern Africa | 41%                        | 3%    | 49%         | 4%    | 13%      | -2%   | 50%          | -2%   | 8%    | -1%   | 35%    | 0%    | 13%   | -2%   | 7%     | -1%   | 16%                     | -2%   |
| Latin America & Caribbean       | 39%                        | 2%    | 45%         | 4%    | 11%      | -1%   | 44%          | -2%   | 6%    | -1%   | 31%    | 0%    | 11%   | -1%   | 5%     | -1%   | 14%                     | -2%   |
| North America                   | 46%                        | 3%    | 49%         | 4%    | 13%      | -2%   | 50%          | -2%   | 8%    | -1%   | 35%    | 0%    | 13%   | -2%   | 7%     | -1%   | 16%                     | -2%   |
| East Asia                       | 21%                        | 1%    | 24%         | 1%    | 5%       | -1%   | 22%          | -2%   | 3%    | 0%    | 14%    | -1%   | 5%    | -1%   | 2%     | 0%    | 6%                      | -1%   |
| South-East Asia                 | 22%                        | 1%    | 22%         | 1%    | 4%       | -1%   | 21%          | -2%   | 3%    | 0%    | 14%    | -1%   | 4%    | -1%   | 2%     | 0%    | 6%                      | -1%   |
| South-Central Asia              | 18%                        | 0%    | 13%         | 0%    | 4%       | -1%   | 19%          | -2%   | 2%    | 0%    | 13%    | -1%   | 4%    | -1%   | 2%     | 0%    | 5%                      | -1%   |
| Eastern Europe                  | 44%                        | 3%    | 48%         | 4%    | 12%      | -2%   | 47%          | -2%   | 7%    | -1%   | 33%    | 0%    | 12%   | -2%   | 6%     | -1%   | 15%                     | -2%   |
| Northern Europe                 | 41%                        | 2%    | 44%         | 3%    | 11%      | -1%   | 44%          | -2%   | 7%    | -1%   | 30%    | 0%    | 11%   | -1%   | 6%     | -1%   | 13%                     | -2%   |
| Southern Europe                 | 42%                        | 2%    | 45%         | 4%    | 11%      | -2%   | 44%          | -3%   | 6%    | -1%   | 30%    | 0%    | 11%   | -1%   | 6%     | -1%   | 14%                     | -2%   |
| Western Europe                  | 40%                        | 2%    | 45%         | 4%    | 11%      | -1%   | 43%          | -3%   | 6%    | -1%   | 30%    | -1%   | 11%   | -1%   | 6%     | -1%   | 13%                     | -2%   |
| Oceania                         | 41%                        | 2%    | 46%         | 3%    | 11%      | -2%   | 45%          | -3%   | 7%    | -1%   | 31%    | 0%    | 11%   | -2%   | 6%     | -1%   | 14%                     | -2%   |

**vii. Estimating Population Attributable Fraction: Changing distribution of body mass index**

We assumed that BMI follows a log-normal distribution (web appendix i), which assigns more weight to higher BMI values (right-skewed) than the normal distribution. We are aware that either the normal or lognormal distribution is at best an approximation to real population data. Comparing the normal to the lognormal distribution allows us to consider the possibility that the distribution is or is not right-skewed. Within population BMI distributions we also observed heterogeneity with regard to population subgroups; for example, lognormal distribution fits slightly better for females than for males and for older than for younger ages. Hence, as a method of incorporating our uncertainty, we estimated PAFs with both distributions.

We found that the choice of BMI distribution (normal vs. lognormal) made no appreciable difference, resulting in changes that were small relative to the effects of uncertainties in the relative risks (Table 3). If there is any difference, assuming a normal distribution slightly overestimated the PAF (maximum by 1%, except for oesophageal adenocarcinoma in North American males). This was mainly observed for cancers that have strong relationships with BMI (oesophageal and gallbladder cancers) and for regions with higher BMI. This can be explained by the similarity of the two distributions between the upper and lower limit of BMI, beyond which the RR was assumed to be constant.

**Table 3. Population attributable fraction (PAF) using normally-distributed body mass index (BMI) and difference (PAF Δ)\* compared with the main results (Table 1a for males and 1b for females)**

\*PAF Δ= PAF main analysis – PAF sensitivity analysis

**MALES**

| region                          | Oesophageal adenocarcinoma |       | Pancreas |       | Kidney |       | Colon |       | Rectum |       |
|---------------------------------|----------------------------|-------|----------|-------|--------|-------|-------|-------|--------|-------|
|                                 | PAF                        | PAF Δ | PAF      | PAF Δ | PAF    | PAF Δ | PAF   | PAF Δ | PAF    | PAF Δ |
| sub-Saharan Africa              | 15%                        | 0%    | 4%       | 0%    | 6%     | 0%    | 5%    | 0%    | 3%     | 0%    |
| Middle East and Northern Africa | 35%                        | 0%    | 11%      | 0%    | 20%    | 0%    | 16%   | 0%    | 8%     | 0%    |
| Latin America & Caribbean       | 35%                        | 0%    | 10%      | 0%    | 19%    | 0%    | 15%   | 1%    | 8%     | 0%    |
| North America                   | 49%                        | -4%   | 14%      | 0%    | 25%    | 0%    | 21%   | 0%    | 11%    | 0%    |
| East Asia                       | 18%                        | 0%    | 5%       | 0%    | 8%     | 0%    | 7%    | 0%    | 4%     | 0%    |
| South-East Asia                 | 14%                        | 0%    | 3%       | 0%    | 6%     | 0%    | 4%    | 0%    | 2%     | 0%    |
| South-Central Asia              | 9%                         | 0%    | 3%       | 0%    | 5%     | 0%    | 4%    | 0%    | 2%     | 0%    |
| Eastern Europe                  | 39%                        | 0%    | 11%      | 0%    | 19%    | 0%    | 16%   | 0%    | 8%     | 0%    |
| Northern Europe                 | 45%                        | -1%   | 13%      | 0%    | 22%    | 0%    | 19%   | 0%    | 10%    | 0%    |
| Southern Europe                 | 43%                        | -1%   | 12%      | 0%    | 22%    | 0%    | 19%   | 0%    | 10%    | 0%    |
| Western Europe                  | 43%                        | -1%   | 13%      | 0%    | 22%    | 0%    | 19%   | 0%    | 10%    | 0%    |
| Oceania                         | 45%                        | -1%   | 13%      | 0%    | 23%    | 0%    | 20%   | 0%    | 10%    | 0%    |

**FEMALES**

| region                          | Oesophageal adenocarcinoma |       | Gallbladder |       | Pancreas |       | Corpus uteri |       | Ovary |       | Kidney |       | Colon |       | Rectum |       | Breast (postmenopausal) |       |
|---------------------------------|----------------------------|-------|-------------|-------|----------|-------|--------------|-------|-------|-------|--------|-------|-------|-------|--------|-------|-------------------------|-------|
|                                 | PAF                        | PAF Δ | PAF         | PAF Δ | PAF      | PAF Δ | PAF          | PAF Δ | PAF   | PAF Δ | PAF    | PAF Δ | PAF   | PAF Δ | PAF    | PAF Δ | PAF                     | PAF Δ |
| sub-Saharan Africa              | 28%                        | 0%    | 20%         | 0%    | 6%       | 0%    | 25%          | 0%    | 2%    | 0%    | 11%    | 0%    | 5%    | 0%    | 2%     | 0%    | 6%                      | 0%    |
| Middle East and Northern Africa | 45%                        | -1%   | 54%         | 0%    | 12%      | 0%    | 49%          | -1%   | 7%    | 0%    | 36%    | -1%   | 12%   | 0%    | 6%     | 0%    | 15%                     | 0%    |
| Latin America & Caribbean       | 42%                        | -1%   | 49%         | -1%   | 10%      | 0%    | 42%          | -1%   | 6%    | 0%    | 31%    | -1%   | 10%   | 0%    | 5%     | 0%    | 13%                     | 0%    |
| North America                   | 49%                        | -1%   | 54%         | -1%   | 12%      | 0%    | 49%          | -1%   | 7%    | 0%    | 35%    | -1%   | 11%   | 0%    | 6%     | 0%    | 15%                     | 0%    |
| East Asia                       | 19%                        | 2%    | 24%         | 1%    | 4%       | 0%    | 20%          | 0%    | 2%    | 0%    | 14%    | 0%    | 4%    | 0%    | 2%     | 0%    | 5%                      | 0%    |
| South-East Asia                 | 23%                        | 0%    | 23%         | 0%    | 4%       | 0%    | 19%          | 0%    | 2%    | 0%    | 13%    | 0%    | 4%    | 0%    | 2%     | 0%    | 5%                      | 0%    |
| South-Central Asia              | 17%                        | 0%    | 13%         | 1%    | 3%       | 0%    | 16%          | 0%    | 2%    | 0%    | 12%    | 0%    | 3%    | 0%    | 1%     | 0%    | 4%                      | 0%    |
| Eastern Europe                  | 47%                        | -1%   | 53%         | -1%   | 11%      | 0%    | 46%          | -1%   | 6%    | 0%    | 34%    | -1%   | 11%   | 0%    | 6%     | 0%    | 14%                     | 0%    |
| Northern Europe                 | 45%                        | -1%   | 48%         | -1%   | 10%      | 0%    | 42%          | -1%   | 6%    | 0%    | 31%    | -1%   | 10%   | 0%    | 5%     | 0%    | 12%                     | 0%    |
| Southern Europe                 | 45%                        | -1%   | 50%         | -1%   | 10%      | 0%    | 42%          | -1%   | 6%    | 0%    | 31%    | -1%   | 10%   | 0%    | 5%     | 0%    | 12%                     | 0%    |
| Western Europe                  | 43%                        | -1%   | 49%         | -1%   | 10%      | 0%    | 41%          | -1%   | 6%    | 0%    | 30%    | -1%   | 10%   | 0%    | 5%     | 0%    | 12%                     | 0%    |
| Oceania                         | 44%                        | -1%   | 50%         | -1%   | 10%      | 0%    | 43%          | -1%   | 6%    | 0%    | 31%    | -1%   | 10%   | 0%    | 5%     | 0%    | 13%                     | 0%    |



#### **viii. Estimating Population Attributable Fraction: Changing the shape of the relative risk**

The dose effect association between BMI and cancer risk differs by cancer site. While a linear relationship is a reasonable assumption for most of these cancers, non-linear associations have been found for endometrial and pancreatic cancer.<sup>7,16</sup>

In our main analysis we calculated PAF assuming a log-logit increment in RR per unit increase in BMI. This was done because the log-logit function mitigates the effects of steeply increasing RR at the right tail of the distribution using the log-linear function. To investigate the impact of different assumptions about the shape of the RR, we repeated our analysis assuming a linear and a log-linear RR shape (Figure 2).

All in all, there was a small difference in PAF between assuming a linear or log-linear RR shape (Table 4 and 5). When compared to the log-logit, PAF was up to 11 percent points lower when using the linear and up to 5 percent points higher when using the log-linear RR shape.

**Table 4. Population attributable fraction (PAF) using linear relative risk shape and difference (PAF Δ)\* compared with the main results (Table 1a for males and 1b for females)**

\*PAF Δ= PAF main analysis – PAF sensitivity analysis

**MALES**

| region                          | Oesophageal adenocarcinoma |       | Pancreas |       | Kidney |       | Colon |       | Rectum |       |
|---------------------------------|----------------------------|-------|----------|-------|--------|-------|-------|-------|--------|-------|
|                                 | PAF                        | PAF Δ | PAF      | PAF Δ | PAF    | PAF Δ | PAF   | PAF Δ | PAF    | PAF Δ |
| sub-Saharan Africa              | 12%                        | 4%    | 4%       | 0%    | 5%     | 1%    | 4%    | 1%    | 2%     | 0%    |
| Middle East and Northern Africa | 26%                        | 8%    | 10%      | 1%    | 17%    | 2%    | 15%   | 2%    | 8%     | 0%    |
| Latin America & Caribbean       | 27%                        | 9%    | 10%      | 1%    | 17%    | 2%    | 14%   | 2%    | 7%     | 0%    |
| North America                   | 37%                        | 7%    | 14%      | 1%    | 22%    | 3%    | 19%   | 2%    | 11%    | 0%    |
| East Asia                       | 13%                        | 4%    | 4%       | 0%    | 7%     | 1%    | 6%    | 1%    | 3%     | 0%    |
| South-East Asia                 | 10%                        | 3%    | 2%       | 0%    | 5%     | 1%    | 4%    | 0%    | 2%     | 0%    |
| South-Central Asia              | 7%                         | 3%    | 3%       | 0%    | 4%     | 1%    | 4%    | 0%    | 2%     | 0%    |
| Eastern Europe                  | 29%                        | 9%    | 10%      | 1%    | 16%    | 2%    | 14%   | 2%    | 8%     | 0%    |
| Northern Europe                 | 34%                        | 10%   | 12%      | 1%    | 19%    | 3%    | 17%   | 2%    | 9%     | 0%    |
| Southern Europe                 | 33%                        | 10%   | 11%      | 1%    | 19%    | 3%    | 16%   | 2%    | 9%     | 0%    |
| Western Europe                  | 33%                        | 10%   | 12%      | 1%    | 19%    | 3%    | 17%   | 2%    | 9%     | 0%    |
| Oceania                         | 34%                        | 10%   | 12%      | 1%    | 20%    | 3%    | 17%   | 2%    | 10%    | 0%    |

**FEMALES**

| region                          | Oesophageal adenocarcinoma |       | Gallbladder |       | Pancreas |       | Corpus uteri |       | Ovary |       | Kidney |       | Colon |       | Rectum |       | Breast (postmenopausal) |       |
|---------------------------------|----------------------------|-------|-------------|-------|----------|-------|--------------|-------|-------|-------|--------|-------|-------|-------|--------|-------|-------------------------|-------|
|                                 | PAF                        | PAF Δ | PAF         | PAF Δ | PAF      | PAF Δ | PAF          | PAF Δ | PAF   | PAF Δ | PAF    | PAF Δ | PAF   | PAF Δ | PAF    | PAF Δ | PAF                     | PAF Δ |
| sub-Saharan Africa              | 21%                        | 7%    | 15%         | 6%    | 5%       | 0%    | 19%          | 6%    | 2%    | 0%    | 9%     | 2%    | 5%    | 0%    | 2%     | 0%    | 6%                      | 0%    |
| Middle East and Northern Africa | 34%                        | 10%   | 40%         | 13%   | 12%      | 0%    | 37%          | 11%   | 7%    | 0%    | 29%    | 6%    | 11%   | 0%    | 6%     | 0%    | 14%                     | 0%    |
| Latin America & Caribbean       | 31%                        | 10%   | 36%         | 13%   | 9%       | 0%    | 32%          | 10%   | 6%    | 0%    | 25%    | 5%    | 9%    | 0%    | 5%     | 0%    | 12%                     | 0%    |
| North America                   | 37%                        | 11%   | 40%         | 13%   | 11%      | 0%    | 37%          | 11%   | 7%    | 0%    | 29%    | 6%    | 11%   | 0%    | 6%     | 0%    | 14%                     | 1%    |
| East Asia                       | 16%                        | 6%    | 18%         | 7%    | 4%       | 0%    | 15%          | 5%    | 2%    | 0%    | 11%    | 3%    | 4%    | 0%    | 2%     | 0%    | 5%                      | 0%    |
| South-East Asia                 | 17%                        | 6%    | 16%         | 7%    | 3%       | 0%    | 14%          | 5%    | 2%    | 0%    | 11%    | 2%    | 3%    | 0%    | 2%     | 0%    | 5%                      | 0%    |
| South-Central Asia              | 13%                        | 4%    | 9%          | 4%    | 3%       | 0%    | 12%          | 4%    | 2%    | 0%    | 10%    | 2%    | 3%    | 0%    | 1%     | 0%    | 4%                      | 0%    |
| Eastern Europe                  | 36%                        | 11%   | 39%         | 13%   | 10%      | 0%    | 34%          | 10%   | 6%    | 0%    | 27%    | 5%    | 11%   | 0%    | 6%     | 0%    | 13%                     | 1%    |
| Northern Europe                 | 33%                        | 10%   | 35%         | 12%   | 9%       | 0%    | 32%          | 10%   | 6%    | 0%    | 25%    | 5%    | 9%    | 0%    | 5%     | 0%    | 11%                     | 0%    |
| Southern Europe                 | 34%                        | 10%   | 36%         | 13%   | 10%      | 0%    | 32%          | 10%   | 5%    | 0%    | 25%    | 5%    | 9%    | 0%    | 5%     | 0%    | 11%                     | 1%    |
| Western Europe                  | 32%                        | 10%   | 36%         | 13%   | 9%       | 0%    | 31%          | 9%    | 5%    | 0%    | 24%    | 5%    | 9%    | 0%    | 5%     | 0%    | 11%                     | 1%    |
| Oceania                         | 33%                        | 10%   | 37%         | 13%   | 10%      | 0%    | 33%          | 10%   | 6%    | 0%    | 25%    | 5%    | 10%   | 0%    | 5%     | 0%    | 12%                     | 1%    |

**Table 5. Population attributable fraction using log-linear relative risk shape and difference (PAF  $\Delta$ )\* compared with the main results (Table 1a for males and 1b for females)**

\*PAF  $\Delta$ = PAF main analysis – PAF sensitivity analysis

**MALES**

| region                          | Oesophageal adenocarcinoma |              | Pancreas |              | Kidney |              | Colon |              | Rectum |              |
|---------------------------------|----------------------------|--------------|----------|--------------|--------|--------------|-------|--------------|--------|--------------|
|                                 | PAF                        | PAF $\Delta$ | PAF      | PAF $\Delta$ | PAF    | PAF $\Delta$ | PAF   | PAF $\Delta$ | PAF    | PAF $\Delta$ |
| sub-Saharan Africa              | 16%                        | -1%          | 4%       | 0%           | 6%     | 0%           | 5%    | 0%           | 3%     | 0%           |
| Middle East and Northern Africa | 37%                        | -2%          | 11%      | -1%          | 21%    | -1%          | 17%   | -1%          | 9%     | 0%           |
| Latin America & Caribbean       | 38%                        | -2%          | 11%      | -1%          | 20%    | -1%          | 16%   | -1%          | 8%     | 0%           |
| North America                   | 52%                        | -7%          | 15%      | -1%          | 27%    | -2%          | 23%   | -2%          | 12%    | -1%          |
| East Asia                       | 18%                        | -1%          | 4%       | 0%           | 8%     | 0%           | 7%    | 0%           | 3%     | 0%           |
| South-East Asia                 | 14%                        | 0%           | 3%       | 0%           | 6%     | 0%           | 4%    | 0%           | 2%     | 0%           |
| South-Central Asia              | 10%                        | 0%           | 3%       | 0%           | 5%     | 0%           | 4%    | 0%           | 2%     | 0%           |
| Eastern Europe                  | 41%                        | -3%          | 11%      | -1%          | 20%    | -1%          | 17%   | -1%          | 9%     | 0%           |
| Northern Europe                 | 47%                        | -4%          | 13%      | -1%          | 23%    | -2%          | 20%   | -1%          | 10%    | -1%          |
| Southern Europe                 | 46%                        | -3%          | 13%      | -1%          | 22%    | -1%          | 19%   | -1%          | 10%    | -1%          |
| Western Europe                  | 46%                        | -3%          | 13%      | -1%          | 23%    | -1%          | 20%   | -1%          | 10%    | -1%          |
| Oceania                         | 48%                        | -3%          | 14%      | -1%          | 24%    | -2%          | 20%   | -1%          | 11%    | -1%          |

**FEMALES**

| region                          | Oesophageal adenocarcinoma |              | Gallbladder |              | Pancreas |              | Corpus uteri |              | Ovary |              | Kidney |              | Colon |              | Rectum |              | Breast (postmenopausal) |              |
|---------------------------------|----------------------------|--------------|-------------|--------------|----------|--------------|--------------|--------------|-------|--------------|--------|--------------|-------|--------------|--------|--------------|-------------------------|--------------|
|                                 | PAF                        | PAF $\Delta$ | PAF         | PAF $\Delta$ | PAF      | PAF $\Delta$ | PAF          | PAF $\Delta$ | PAF   | PAF $\Delta$ | PAF    | PAF $\Delta$ | PAF   | PAF $\Delta$ | PAF    | PAF $\Delta$ | PAF                     | PAF $\Delta$ |
| sub-Saharan Africa              | 30%                        | -2%          | 22%         | -2%          | 6%       | 0%           | 27%          | -2%          | 2%    | 0%           | 12%    | -1%          | 5%    | 0%           | 2%     | 0%           | 6%                      | 0%           |
| Middle East and Northern Africa | 48%                        | -4%          | 58%         | -5%          | 13%      | -1%          | 52%          | -5%          | 7%    | -1%          | 38%    | -3%          | 12%   | -1%          | 6%     | -1%          | 16%                     | -1%          |
| Latin America & Caribbean       | 45%                        | -4%          | 53%         | -4%          | 10%      | -1%          | 45%          | -4%          | 6%    | 0%           | 33%    | -3%          | 10%   | -1%          | 5%     | 0%           | 13%                     | -1%          |
| North America                   | 53%                        | -4%          | 58%         | -5%          | 12%      | -1%          | 52%          | -4%          | 7%    | -1%          | 38%    | -3%          | 12%   | -1%          | 6%     | 0%           | 16%                     | -1%          |
| East Asia                       | 23%                        | -1%          | 27%         | -2%          | 4%       | 0%           | 21%          | -1%          | 2%    | 0%           | 14%    | -1%          | 4%    | 0%           | 2%     | 0%           | 5%                      | 0%           |
| South-East Asia                 | 24%                        | -2%          | 24%         | -2%          | 4%       | 0%           | 20%          | -1%          | 2%    | 0%           | 14%    | -1%          | 4%    | 0%           | 2%     | 0%           | 5%                      | 0%           |
| South-Central Asia              | 19%                        | -1%          | 14%         | -1%          | 3%       | 0%           | 18%          | -1%          | 2%    | 0%           | 13%    | -1%          | 4%    | 0%           | 2%     | 0%           | 4%                      | 0%           |
| Eastern Europe                  | 51%                        | -4%          | 57%         | -5%          | 12%      | -1%          | 49%          | -4%          | 6%    | 0%           | 36%    | -3%          | 12%   | -1%          | 6%     | 0%           | 15%                     | -1%          |
| Northern Europe                 | 48%                        | -4%          | 52%         | -4%          | 10%      | -1%          | 45%          | -4%          | 6%    | 0%           | 33%    | -3%          | 10%   | -1%          | 5%     | 0%           | 13%                     | -1%          |
| Southern Europe                 | 48%                        | -4%          | 53%         | -4%          | 11%      | -1%          | 45%          | -4%          | 6%    | 0%           | 32%    | -3%          | 10%   | -1%          | 5%     | 0%           | 13%                     | -1%          |
| Western Europe                  | 46%                        | -4%          | 53%         | -4%          | 10%      | -1%          | 44%          | -3%          | 6%    | 0%           | 32%    | -3%          | 10%   | -1%          | 5%     | 0%           | 12%                     | -1%          |
| Oceania                         | 47%                        | -4%          | 54%         | -4%          | 11%      | -1%          | 46%          | -4%          | 6%    | 0%           | 33%    | -3%          | 11%   | -1%          | 5%     | 0%           | 13%                     | -1%          |

**ix. Estimating Population Attributable Fraction: Global relative risk versus region-specific relative risk**

Recent evidence suggested varying effects of high BMI on cancer risk by ethnicity and geographical location. For example the protective effect of obesity on premenopausal breast cancer is confined to African and Caucasian women, while it is the opposite in Asian women, where a significant positive association has been observed.<sup>17</sup> We recalculated the PAF using regional RRs for North America, Europe, Australia and Asia Pacific and compared this to the PAF calculated using common RRs for all world regions (RRs are summarized in Table 6). Region-specific RRs were not available for oesophageal adenocarcinoma and kidney cancer for both genders, and for gallbladder cancer in females. Therefore PAFs were not recalculated for these cancer sites.

In general, the region-specific PAF was similar to the PAF obtained from our main analysis (Table 7). The largest difference observed was for pancreatic cancer in North America, where estimated PAF was 41% and 18%, in males and females respectively, when regional-specific RRs were used compared to 14% in males and 11% in females in our main analysis. This was caused by the high RR found for North American population in the study by Renehan and colleagues.<sup>9</sup> Furthermore, the PAF of breast cancer due to excess BMI varied by region/ethnic group; the PAF for postmenopausal breast cancer in Asian females increased from 4-5% to 10-13% using the region-specific RR estimates. For premenopausal breast cancer, Asian females were the only group with an increased risk (PAF 1-2%), whereas an inverse association and corresponding zero or negative PAFs were observed for African and Caucasian females. This suggested an overestimation of the negative PAFs of premenopausal breast cancer in **part ix** of this document when using region-specific RRs, particularly for Asian females.

**Table 6. Regional relative risk estimates****A. Colon cancer**

| <i>Region</i> | <i>Sex</i> | <i>Unit (kg/m<sup>2</sup>)</i> | <i>RR<sup>a</sup></i> | <i>95%CI<sup>b</sup></i> | <i>Source</i>     |
|---------------|------------|--------------------------------|-----------------------|--------------------------|-------------------|
| USA           | Males      | 1                              | 1•06                  | 1•04-1•08                | CUP/WCRF          |
| Asia          | Males      | 1                              | 1•05                  | 1•01-1•09                | 2011 <sup>8</sup> |
| Europe        | Males      | 1                              | 1•04                  | 1•03-1•04                |                   |
| Australia     | Males      | 1                              | 1•05                  | 1•01-1•10                |                   |
| USA           | Females    | 1                              | 1•03                  | 1•01-1•04                |                   |
| Asia          | Females    | 1                              | 1•02                  | 0•99-1•05                |                   |
| Europe        | Females    | 1                              | 1•01                  | 1•00-1•01                |                   |
| Australia     | Females    | 1                              | 1•01                  | 0•98-1•04                |                   |

<sup>a</sup>RR: Relative risk; <sup>b</sup>95%CI: 95% confidence interval**B. Rectal cancer**

| <i>Region</i> | <i>Sex</i> | <i>Unit (kg/m<sup>2</sup>)</i> | <i>RR<sup>a</sup></i> | <i>95%CI<sup>b</sup></i> | <i>Source</i>     |
|---------------|------------|--------------------------------|-----------------------|--------------------------|-------------------|
| USA           | Males      | 1                              | 1•01                  | 0•99-1•02                | CUP/WCRF          |
| Asia          | Males      | 1                              | 1•01                  | 0•97-1•04                | 2011 <sup>8</sup> |
| Europe        | Males      | 1                              | 1•02                  | 1•01-1•03                |                   |
| Australia     | Males      | 1                              | 1•02                  | 0•97-1•07                |                   |
| USA           | Females    | 1                              | 1•03                  | 1•01-1•05                |                   |
| Asia          | Females    | 1                              | 1•02                  | 1•00-1•04                |                   |
| Europe        | Females    | 1                              | 1•00                  | 1•00-1•01                |                   |
| Australia     | Females    | 1                              | 1•00                  | 0•95-1•04                |                   |

<sup>a</sup>RR: Relative risk; <sup>b</sup>95%CI: 95% confidence interval**C. Pancreatic cancer**

| <i>Region</i>    | <i>Sex</i> | <i>Unit (kg/m<sup>2</sup>)</i> | <i>RR<sup>a</sup></i> | <i>95%CI<sup>b</sup></i> | <i>Source</i>         |
|------------------|------------|--------------------------------|-----------------------|--------------------------|-----------------------|
| North America    | Males      | 5                              | 1•43                  | 1•19-1•72                | Renehan et            |
| Asia-Pacific     | Males      | 5                              | 0•77                  | 0•54-1•11                | al. 2008 <sup>9</sup> |
| Europe/Australia | Males      | 5                              | 1•08                  | 0•93-1•24                |                       |
| North America    | Females    | 5                              | 1•16                  | 1•03-1•31                |                       |
| Asia-Pacific     | Females    | 5                              | 1•34                  | 0•98-1•83                |                       |
| Europe/Australia | Females    | 5                              | 1•14                  | 1•05-1•23                |                       |

<sup>a</sup>RR: Relative risk; <sup>b</sup>95%CI: 95% confidence interval**D. Breast cancer**

| <i>Region</i>      | <i>Status</i>  | <i>Unit (kg/m<sup>2</sup>)</i> | <i>RR<sup>a</sup></i> | <i>95%CI<sup>b</sup></i> | <i>Source</i>          |
|--------------------|----------------|--------------------------------|-----------------------|--------------------------|------------------------|
| Asian (ethnic)     | Pre-menopausal | 5                              | 1•05                  | 1•01-1•09                | Amadou et              |
| African (ethnic)   | Pre-menopausal | 5                              | 0•95                  | 0•91-0•98                | al. 2013 <sup>17</sup> |
| Caucasian (ethnic) | Pre-menopausal | 5                              | 0•93                  | 0•91-0•95                |                        |
| North America      | Postmenopausal | 5                              | 1•15                  | 1•08-1•23                | Renehan et             |
| Asia-Pacific       | Postmenopausal | 5                              | 1•31                  | 1•15-1•48                | al. 2008 <sup>9</sup>  |
| Europe/Australia   | Postmenopausal | 5                              | 1•09                  | 1•04-1•14                |                        |

<sup>a</sup>RR: Relative risk; <sup>b</sup>95%CI: 95% confidence interval**E. Ovarian cancer**

| <i>Region</i>    | <i>Unit (kg/m<sup>2</sup>)</i> | <i>RR<sup>a</sup></i> | <i>95%CI<sup>b</sup></i> | <i>Source</i>         |
|------------------|--------------------------------|-----------------------|--------------------------|-----------------------|
| North America    | 5                              | 0•97                  | 0•85-1•11                | Renehan et            |
| Asia-Pacific     | 5                              | 1•39                  | 0•66-2•89                | al. 2008 <sup>9</sup> |
| Europe/Australia | 5                              | 1•03                  | 0•98-1•07                |                       |

<sup>a</sup>RR: Relative risk; <sup>b</sup>95%CI: 95% confidence interval

**F. Corpus uteri cancer**

| <i>Region</i>    | <i>Unit<br/>(kg/m<sup>2</sup>)</i> | <i>RR<sup>a</sup></i> | <i>95%CI<sup>b</sup></i> | <i>Source</i>                    |
|------------------|------------------------------------|-----------------------|--------------------------|----------------------------------|
| North America    | 5                                  | 1•56                  | 1•29-1•88                | Renehan et al. 2008 <sup>9</sup> |
| Asia-Pacific     | 5                                  | 1•72                  | 0•94-3•16                |                                  |
| Europe/Australia | 5                                  | 1•58                  | 1•49-1•67                |                                  |

<sup>a</sup>RR: Relative risk; <sup>b</sup>95%CI: 95% confidence interval

**Table 7. Population attributable fraction using regional relative risk estimates and difference (PAF  $\Delta$ )\* compared with the main results (Table 1a for males and 1b for females)**

\*PAF  $\Delta$ = PAF main analysis – PAF sensitivity analysis

**MALES**

| <i>region</i>      | <i>Pancreas</i> |              | <i>Colon</i> |              | <i>Rectum</i> |              |
|--------------------|-----------------|--------------|--------------|--------------|---------------|--------------|
|                    | PAF             | PAF $\Delta$ | PAF          | PAF $\Delta$ | PAF           | PAF $\Delta$ |
| North America      | 41%             | -27%         | 30%          | -9%          | 6%            | 5%           |
| East Asia          | 0%              | 4%           | 9%           | -2%          | 2%            | 2%           |
| South-East Asia    | 0%              | 3%           | 5%           | -1%          | 1%            | 1%           |
| South-Central Asia | 0%              | 3%           | 5%           | -1%          | 1%            | 1%           |
| Eastern Europe     | 6%              | 4%           | 16%          | 0%           | 8%            | 0%           |
| Northern Europe    | 8%              | 5%           | 18%          | 0%           | 9%            | 0%           |
| Southern Europe    | 7%              | 4%           | 18%          | 0%           | 9%            | 0%           |
| Western Europe     | 8%              | 5%           | 17%          | 1%           | 10%           | 0%           |
| Oceania            | 8%              | 5%           | 23%          | -4%          | 10%           | 0%           |

**FEMALES**

| <i>region</i>                   | <i>Pancreas</i> |              | <i>Corpus uteri</i> |              | <i>Ovary</i> |              | <i>Colon</i> |              | <i>Rectum</i> |              | <i>Breast (premenopausal)</i> |              | <i>Breast (postmenopausal)</i> |              |
|---------------------------------|-----------------|--------------|---------------------|--------------|--------------|--------------|--------------|--------------|---------------|--------------|-------------------------------|--------------|--------------------------------|--------------|
|                                 | PAF             | PAF $\Delta$ | PAF                 | PAF $\Delta$ | PAF          | PAF $\Delta$ | PAF          | PAF $\Delta$ | PAF           | PAF $\Delta$ | PAF                           | PAF $\Delta$ | PAF                            | PAF $\Delta$ |
| sub-Saharan Africa              |                 |              |                     |              |              |              |              |              |               |              | -2%                           | -1%          |                                |              |
| Middle East and Northern Africa |                 |              |                     |              |              |              |              |              |               |              | -4%                           | -2%          |                                |              |
| North America                   | 18%             | -6%          | 52%                 | -4%          | 0%           | 7%           | 16%          | -5%          | 16%           | -11%         | -7%                           | 0%           | 17%                            | -3%          |
| East Asia                       | 14%             | -10%         | 29%                 | -9%          | 15%          | -13%         | 4%           | 0%           | 4%            | -2%          | 1%                            | -3%          | 13%                            | -8%          |
| South-East Asia                 | 12%             | -9%          | 27%                 | -9%          | 15%          | -13%         | 4%           | 0%           | 4%            | -2%          | 2%                            | -4%          | 12%                            | -7%          |
| South-Central Asia              | 11%             | -8%          | 24%                 | -7%          | 11%          | -9%          | 3%           | 0%           | 3%            | -1%          | 1%                            | -3%          | 10%                            | -6%          |
| Eastern Europe                  | 14%             | -4%          | 50%                 | -5%          | 3%           | 3%           | 5%           | 5%           | 0%            | 5%           | -4%                           | 0%           | 10%                            | 4%           |
| Northern Europe                 | 13%             | -4%          | 47%                 | -5%          | 3%           | 3%           | 5%           | 5%           | 0%            | 5%           | -5%                           | 0%           | 9%                             | 3%           |
| Southern Europe                 | 14%             | -4%          | 46%                 | -5%          | 3%           | 3%           | 5%           | 5%           | 0%            | 5%           | -3%                           | 0%           | 9%                             | 3%           |
| Western Europe                  | 13%             | -4%          | 46%                 | -5%          | 3%           | 3%           | 5%           | 5%           | 0%            | 5%           | -3%                           | 0%           | 8%                             | 3%           |
| Oceania                         | 14%             | -4%          | 48%                 | -5%          | 3%           | 3%           | 5%           | 5%           | 0%            | 5%           | -5%                           | 0%           | 9%                             | 3%           |

**x. Adjusting Population Attributable Fraction: effect modifier and confounder**

**a. Confounding: Smoking, body mass index and pancreatic cancer**

A pooled analysis of 7 prospective cohorts<sup>18</sup> has shown a higher risk of pancreatic cancer due to high BMI among never and former smokers compared to current smokers. The reduced risks associated with BMI have also been reported for oesophageal squamous cell carcinoma and lung cancer, among smokers; however this has been postulated due to competing risk of tobacco carcinogens or mortality among smokers compared to non- or former smokers.<sup>19</sup>

We calculated stratified PAF estimates for pancreatic cancer for past and current smokers (as the risk is similar in never and past smokers), using data from the WHO Study on global AGEing and adult health (SAGE) study for six countries, namely China, Ghana, India, Mexico, Russia and South Africa, as well as the NHANES study from the USA (2007-2010) and the Health Survey for England (2007-2010). RR estimates were taken from Genkinger et al (RR: 1.07 and 1.22, for current and past smokers respectively, the latter being very similar to the RR in never smokers (1.19)).<sup>20</sup> Thereafter, we calculated the combined PAF by treating smoking status as a discrete variable in the PAF equation (this is referred to as “PAF adjusted”).<sup>21</sup> This is compared with the PAF calculated using BMI and RR not stratified by smoking status (referred to as “PAF unadjusted”).

Table 8 shows that on average the BMI is higher among never and past smokers compared to smokers in all countries and both sexes when. As expected, PAF of pancreatic cancer due to excess BMI is much lower among current smokers as compared to never and past smokers. PAFs for current smokers ranged from 0-7% in males and 1-8% in females. When PAF for pancreatic cancer was adjusted for smoking and compared to the PAF using unadjusted RR estimates, we observed a 0-5% point difference in males and 0-9% point difference in females. This difference was largest in the UK for both males and females.



**Table 8. Mean body mass index (BMI), population attributable fraction (PAF) of excess BMI on pancreatic cancer in current and past smokers and overall PAF adjusted and unadjusted for smoking, by sex**

| <i>males</i>   | <i>mean BMI</i> |                        | <i>PAF, pancreatic cancer</i> |                        |                             |                           |
|----------------|-----------------|------------------------|-------------------------------|------------------------|-----------------------------|---------------------------|
|                | Current smokers | Never and past smokers | Current smokers               | Never and past smokers | PAF unadjusted <sup>a</sup> | PAF adjusted <sup>b</sup> |
| China          | 23•1            | 24•0                   | 2%                            | 9%                     | 4%                          | 3%                        |
| Ghana          | 21•0            | 22•2                   | 1%                            | 6%                     | 2%                          | 3%                        |
| India          | 20•1            | 20•7                   | 0%                            | 3%                     | 1%                          | 1%                        |
| Mexico         | 27•0            | 27•6                   | 6%                            | 21%                    | 12%                         | 14%                       |
| Russia         | 26•1            | 28•0                   | 5%                            | 22%                    | 11%                         | 11%                       |
| South Africa   | 25•7            | 27•3                   | 5%                            | 20%                    | 11%                         | 10%                       |
| UK             | 26•5            | 28•0                   | 6%                            | 22%                    | 13%                         | 18%                       |
| USA            | 27•2            | 29•2                   | 7%                            | 25%                    | 14%                         | 17%                       |
| <i>females</i> |                 |                        |                               |                        |                             |                           |
| China          | 23•4            | 24•7                   | 3%                            | 12%                    | 4%                          | 5%                        |
| Ghana          | 21•4            | 24•0                   | 2%                            | 11%                    | 4%                          | 5%                        |
| India          | 20•2            | 21•3                   | 1%                            | 6%                     | 1%                          | 1%                        |
| Mexico         | 28•8            | 29•2                   | 8%                            | 25%                    | 12%                         | 17%                       |
| Russia         | 26•9            | 29•1                   | 6%                            | 25%                    | 10%                         | 15%                       |
| South Africa   | 27•5            | 29•4                   | 5%                            | 26%                    | 10%                         | 11%                       |
| UK             | 26•7            | 27•4                   | 6%                            | 20%                    | 9%                          | 18%                       |
| USA            | 28•3            | 29•6                   | 8%                            | 26%                    | 12%                         | 17%                       |

<sup>a</sup> Using the RR from the main analysis, irrespective of smoking status

<sup>b</sup> Treating smoking as a discrete variable in the PAF equation

**b. Effect modification: Hormonal Replacement Therapy (HRT) and cancer of the corpus uteri and postmenopausal breast**

HRT usage has been recently associated with an increased breast cancer risk. Its usage has declined considerably in many high income countries since this harmful effect was reported in 2002.<sup>22</sup> Yet among women with excess BMI, HRT usage has also been found to attenuate the negative effects of excess BMI on breast cancer risk (RR: 0.98 and RR: 1.04 (per 2kg/m<sup>2</sup> among HRT users and HRT non-users, respectively<sup>6</sup>). This observation was also found with the relation of HRT usage on risk of cancer of the corpus uteri and ovary (RR: 1.15 and RR: 1.73 for corpus uteri cancer among HRT users and HRT non-users<sup>5</sup>; RR: 0.95 and RR: 1.10 for ovarian cancer among HRT users and HRT non-users<sup>23</sup>, respectively, all per 5kg/m<sup>2</sup>). In order to assess the impact of HRT on the estimates, we recalculated the PAF for postmenopausal breast, ovarian and endometrial cancer, using BMI data in HRT users and non-users from the WHO MONICA study. In a next step, we calculated the PAF adjusted for the population level of HRT usage by treating HRT use as a discrete variable in the PAF equation (“PAF adjusted”)<sup>21</sup>. This was then compared to the PAF (“PAF unadjusted”) which was calculated without taking into account the varying effects of BMI on cancer risks among HRT users and non-users.

Table 9 shows that the mean BMI is in general slightly higher among HRT non-users when compared to users. This, together with the larger risk of cancer related to obesity in HRT non-users, translated into a higher PAF in this group, ranging from 50-65% for corpus uteri cancer and from 8-12% for postmenopausal breast and ovarian cancer. When comparing the adjusted to the unadjusted PAF, the difference was small for most countries, however, largest in countries where HRT usage was high.

**Table 9. Mean BMI, population attributable fraction (PAF) for hormonal replacement therapy (HRT) users and non-users for breast, ovarian and corpus uteri cancer in postmenopausal women and overall PAF adjusted and unadjusted for HRT use**

|                | <i>Mean BMI</i> |         | <i>PAF Corpus uteri cancer</i> |         |                             |                           | <i>PAF Postmenopausal breast cancer</i> |         |                             |                           | <i>PAF ovarian cancer</i> |         |                             |                           |
|----------------|-----------------|---------|--------------------------------|---------|-----------------------------|---------------------------|-----------------------------------------|---------|-----------------------------|---------------------------|---------------------------|---------|-----------------------------|---------------------------|
|                | HRT no          | HRT yes | HRT no                         | HRT yes | PAF unadjusted <sup>a</sup> | PAF adjusted <sup>b</sup> | HRT no                                  | HRT yes | PAF unadjusted <sup>a</sup> | PAF adjusted <sup>b</sup> | HRT no                    | HRT yes | PAF unadjusted <sup>a</sup> | PAF adjusted <sup>b</sup> |
| Australia      | 28•0            | 26•9    | 59%                            | 13%     | 42%                         | 40%                       | 10%                                     | -5%     | 12%                         | 4%                        | 10%                       | -5%     | 6%                          | 4%                        |
| Belgium        | 27•5            | 26•4    | 56%                            | 12%     | 40%                         | 46%                       | 10%                                     | -4%     | 11%                         | 6%                        | 10%                       | -4%     | 6%                          | 6%                        |
| Canada         | 27•9            | 28•2    | 59%                            | 16%     | 45%                         | 44%                       | 10%                                     | -6%     | 13%                         | 5%                        | 10%                       | -6%     | 6%                          | 5%                        |
| Czech Republic | 29•4            | 28•1    | 64%                            | 16%     | 50%                         | 64%                       | 12%                                     | -5%     | 15%                         | 12%                       | 12%                       | -5%     | 8%                          | 12%                       |
| Finland        | 28•8            | 26•9    | 62%                            | 13%     | 46%                         | 51%                       | 11%                                     | -5%     | 13%                         | 8%                        | 11%                       | -5%     | 7%                          | 8%                        |
| France         | 27•6            | 25•5    | 58%                            | 10%     | 40%                         | 43%                       | 10%                                     | -3%     | 11%                         | 5%                        | 10%                       | -3%     | 5%                          | 5%                        |
| Germany        | 27•9            | 25•8    | 58%                            | 10%     | 43%                         | 55%                       | 10%                                     | -4%     | 12%                         | 9%                        | 10%                       | -4%     | 6%                          | 9%                        |
| Iceland        | 27•6            | 27•3    | 56%                            | 14%     | 42%                         | 46%                       | 10%                                     | -5%     | 12%                         | 6%                        | 10%                       | -5%     | 6%                          | 6%                        |
| Italy          | 26•6            | 25•0    | 50%                            | 9%      | 37%                         | 49%                       | 8%                                      | -3%     | 10%                         | 8%                        | 8%                        | -3%     | 5%                          | 8%                        |
| Lithuania      | 29•6            | 30•7    | 65%                            | 21%     | 51%                         | 64%                       | 13%                                     | -8%     | 16%                         | 12%                       | 13%                       | -8%     | 8%                          | 12%                       |
| Poland         | 29•2            | 28•8    | 64%                            | 17%     | 49%                         | 63%                       | 12%                                     | -6%     | 15%                         | 12%                       | 12%                       | -6%     | 7%                          | 12%                       |
| Russia         | 28•0            | 28•3    | 59%                            | 16%     | 44%                         | 58%                       | 10%                                     | -6%     | 13%                         | 10%                       | 10%                       | -6%     | 6%                          | 10%                       |
| Spain          | 28•7            | 28•1    | 61%                            | 15%     | 47%                         | 59%                       | 11%                                     | -6%     | 14%                         | 10%                       | 11%                       | -6%     | 7%                          | 10%                       |
| Sweden         | 26•5            | 25•9    | 51%                            | 11%     | 36%                         | 41%                       | 8%                                      | -4%     | 10%                         | 5%                        | 8%                        | -4%     | 5%                          | 5%                        |
| Switzerland    | 26•5            | 25•0    | 51%                            | 9%      | 36%                         | 43%                       | 8%                                      | -3%     | 10%                         | 6%                        | 8%                        | -3%     | 5%                          | 6%                        |
| UK             | 26•8            | 26•5    | 53%                            | 12%     | 39%                         | 46%                       | 9%                                      | -4%     | 11%                         | 6%                        | 9%                        | -4%     | 5%                          | 6%                        |
| USA            | 27•1            | 26•0    | 57%                            | 12%     | 41%                         | 41%                       | 9%                                      | -4%     | 11%                         | 4%                        | 9%                        | -4%     | 5%                          | 4%                        |

<sup>a</sup> Population attributable fraction estimated using the RR from the main analysis, irrespective of HRT usage

<sup>b</sup> Treating HRT use (yes/no) as a discrete variable in the PAF equation

**xi. Adding cancer sites to the obesity-related cancers: Impact of thyroid cancer, non-Hodgkin lymphoma and premenopausal breast cancer**

We added two more cancer sites in our PAF estimates due to the emerging new studies showing convincing evidence of a positive association with excess BMI, namely cancer of the thyroid gland and non-Hodgkin lymphoma (NHL). In this section, we also estimated PAF of premenopausal breast cancer since multiple studies have shown an inverse relationship between excess BMI and premenopausal breast cancer suggesting a protective effect.<sup>6,9,16</sup> The corresponding RRs and sources are presented in Table 10.

Table 11 summarizes the PAF estimates and the attributable cancer cases after including thyroid, premenopausal breast cancer and NHL as obesity related cancers in the analysis. Overall, including these additional cancer sites changed the percentage of the global cancer burden attributable to excess BMI from 3.6 to 3.8%, with about 32,000 additional cases when compared to the main analysis. With the additional cancer sites, 11% of obesity-related cancers and 2.2% of total cancers in males were attributable to excess BMI. In females, these figures were 10% and 5.6%; very similar to our main model. This was mainly due to the introduction of premenopausal breast cancer and its inverse association with obesity, which resulted in negative PAFs. This was, however, largely set off by the additional burden due to thyroid cancer and NHL.

**Table 10. Relative risks (RR) for additional cancer sites that have been suggested as having a relationship with excess body mass index**

| <i>Cancer site (ICD-10)</i> | <i>RR* per 5kg/m<sup>2</sup></i> | <i>Source</i> |
|-----------------------------|----------------------------------|---------------|
| <i>Males</i>                |                                  |               |
| Thyroid gland               | 1.33 (1.04-1.70)                 | 9             |
| NHL <sup>a</sup>            | 1.09 (1.04-1.14)                 | 24            |
| <i>Females</i>              |                                  |               |
| Thyroid gland               | 1.14 (1.06-1.23)                 | 9             |
| NHL <sup>a</sup>            | 1.07 (1.02-1.13)                 | 24            |
| Breast (premenopausal)      | 0.93 (0.86-0.98)                 | 6             |

<sup>a</sup> NHL: Non-Hodgkin Lymphoma; \*RRs were transformed to per-unit-increase in BMI using linear interpolation

**Table 11. Population attributable fraction (PAF, %) and number of new cancer cases (N) attributable to excess body mass index for additional cancer sites by sex**

**MALES**

| Region                          | Thyroid |       | NHL <sup>a</sup> |       | Total <sup>b</sup> |                          |                              |
|---------------------------------|---------|-------|------------------|-------|--------------------|--------------------------|------------------------------|
|                                 | PAF     | N     | PAF              | N     | N                  | PAF obesity <sup>c</sup> | PAF all cancers <sup>d</sup> |
| sub-Saharan Africa              | 5%      | 75    | 2%               | 165   | 1107               | 4%                       | 0•5%                         |
| Middle East and Northern Africa | 24%     | 758   | 7%               | 803   | 6542               | 13%                      | 2•6%                         |
| Latin America & Caribbean       | 22%     | 936   | 7%               | 896   | 11841              | 14%                      | 2•4%                         |
| North America                   | 32%     | 4299  | 10%              | 3661  | 39690              | 20%                      | 4•4%                         |
| East Asia                       | 11%     | 1887  | 3%               | 1119  | 24404              | 6%                       | 1•0%                         |
| South-East Asia                 | 7%      | 327   | 2%               | 227   | 2310               | 3%                       | 0•6%                         |
| South-Central Asia              | 6%      | 263   | 2%               | 326   | 3063               | 3%                       | 0•5%                         |
| Eastern Europe                  | 23%     | 664   | 7%               | 571   | 16753              | 14%                      | 3•3%                         |
| Northern Europe                 | 27%     | 298   | 8%               | 806   | 11347              | 17%                      | 4•3%                         |
| Southern Europe                 | 26%     | 900   | 8%               | 979   | 15923              | 16%                      | 3•8%                         |
| Western Europe                  | 26%     | 1018  | 8%               | 1492  | 22746              | 16%                      | 3•8%                         |
| Oceania                         | 28%     | 189   | 9%               | 270   | 3264               | 17%                      | 4•0%                         |
| Low HDI <sup>e</sup>            | 5%      | 116   | 2%               | 209   | 1220               | 3%                       | 0•4%                         |
| Medium HDI <sup>e</sup>         | 9%      | 1649  | 3%               | 1461  | 21694              | 5%                       | 0•8%                         |
| High HDI <sup>e</sup>           | 21%     | 1841  | 6%               | 1548  | 24916              | 13%                      | 2•5%                         |
| Very high HDI <sup>e</sup>      | 26%     | 8008  | 8%               | 8099  | 111158             | 15%                      | 3•7%                         |
| World                           | 19%     | 11615 | 6%               | 11316 | 158989             | 11%                      | 2•2%                         |

<sup>a</sup> NHL: non-Hodgkin lymphoma

<sup>b</sup> Represents the total together with the cancer sites included in the main analysis (Table 1a)

<sup>c</sup> PAF obesity: proportion of cancer attributable to obesity out of obesity-related cancers i.e. oesophageal adenocarcinoma, pancreas, kidney, thyroid, NHL, colon, rectum

<sup>d</sup> PAF all cancers: proportion of cancer attributable to obesity out of total cancers excluding non-melanoma skin cancers

<sup>e</sup> HDI: Human development index

## FEMALES

| region                          | Thyroid |       | NHL <sup>a</sup> |      | Breast<br>(premenopausal) |        | Total <sup>b</sup> |                             |                                 |
|---------------------------------|---------|-------|------------------|------|---------------------------|--------|--------------------|-----------------------------|---------------------------------|
|                                 | PAF     | N     | PAF              | N    | PAF                       | N      | N                  | PAF<br>obesity <sup>c</sup> | PAF all<br>cancers <sup>d</sup> |
| sub-Saharan Africa              | 5%      | 197   | 3%               | 188  | -2%                       | -1043  | 5754               | 4%                          | 1•8%                            |
| Middle East and Northern Africa | 13%     | 1654  | 8%               | 705  | -6%                       | -2136  | 17241              | 12%                         | 7•1%                            |
| Latin America & Caribbean       | 11%     | 2150  | 6%               | 762  | -5%                       | -2515  | 34074              | 12%                         | 6•4%                            |
| North America                   | 5%      | 3050  | 3%               | 712  | -2%                       | -1924  | 83656              | 16%                         | 9•9%                            |
| East Asia                       | 5%      | 580   | 2%               | 244  | -3%                       | -1107  | 50030              | 7%                          | 3•1%                            |
| South-East Asia                 | 4%      | 450   | 2%               | 242  | -2%                       | -1586  | 8181               | 4%                          | 2•2%                            |
| South-Central Asia              | 13%     | 1898  | 7%               | 630  | -5%                       | -1090  | 11788              | 3%                          | 1•6%                            |
| Eastern Europe                  | 14%     | 5494  | 8%               | 2483 | -7%                       | -3306  | 51863              | 16%                         | 10•1%                           |
| Northern Europe                 | 11%     | 384   | 7%               | 532  | -5%                       | -711   | 19897              | 13%                         | 8•0%                            |
| Southern Europe                 | 11%     | 1041  | 6%               | 653  | -4%                       | -847   | 27876              | 13%                         | 8•4%                            |
| Western Europe                  | 10%     | 972   | 6%               | 984  | -4%                       | -1152  | 38658              | 12%                         | 7•9%                            |
| Oceania                         | 12%     | 239   | 7%               | 169  | -5%                       | -248   | 4883               | 12%                         | 7•4%                            |
| Low HDI <sup>e</sup>            | 4%      | 281   | 2%               | 206  | -2%                       | -1352  | 6183               | 3%                          | 1•3%                            |
| Medium HDI <sup>e</sup>         | 5%      | 2624  | 3%               | 1156 | -2%                       | -4834  | 60422              | 6%                          | 2•7%                            |
| High HDI <sup>e</sup>           | 12%     | 4647  | 7%               | 1423 | -5%                       | -4430  | 78265              | 13%                         | 7•7%                            |
| Very high HDI <sup>e</sup>      | 10%     | 10557 | 7%               | 5519 | -5%                       | -7049  | 209030             | 13%                         | 8•1%                            |
| World                           | 9%      | 18108 | 5%               | 8304 | -3%                       | -17666 | 353901             | 10%                         | 5•6%                            |

<sup>a</sup> NHL: non-Hodgkin lymphoma

<sup>b</sup> Represents the total together with the cancer sites included in the main analysis (Table 1b)

<sup>c</sup> PAF obesity: proportion of cancer attributable to obesity out of obesity-related cancers i.e. oesophageal adenocarcinoma, pancreas, kidney, thyroid, NHL, breast, ovary, corpus uteri, gallbladder, colon, rectum

<sup>d</sup> PAF all cancers: proportion of cancer attributable to obesity out of total cancers excluding non-melanoma skin cancers

<sup>e</sup> HDI: Human development index

## **xii. Counterfactual scenario : Maintaining the 1982 BMI**

In view of the globally growing obesity prevalence, a population mean BMI of 22 (or 21 in many earlier studies<sup>25</sup>) as the theoretical minimum value in the PAF calculations measures the full disease burden that can be ascribed to any BMI value beyond this threshold. It is therefore more of a conceptual value of the full impact of BMI reduction to this minimum, rather than a realistically attainable value through preventive interventions. In order to shed light on the realistically attainable fraction (i.e. the achievable part of the attributable fraction), we recalculated the PAF using historical mean BMI values as theoretical minimum (only if it was above BMI=22). We thereby assessed the burden of cancer that could potentially be avoided if the mean BMI of a population was that of 30 years ago, i.e. in 1982, as compared to that of 2002. Using a baseline BMI value that was prevalent in the same population in the recent past seems to be a more reasonable assumption – and therefore was used here to illustrate the potential effect of prevention.

In total, 0·5% of all cancers in males and 1·3% in females were realistically avoidable (Table 12). This also means that between 1982 and 2002, the proportion of cancers attributable to excess BMI has increased by 0·5% and 1·3% in males and females respectively. Altogether, this represents about one fourth (or 118,000 cases) of all cancers attributable to excess BMI in 2012. In some world regions such as sub-Saharan Africa and (South-East) Asia, the realistically avoidable fraction was zero, meaning that the average population BMI has not grown larger than 22 during this period.

**Table 12. Attributable fraction using historical BMI distribution**

**MALES**

| <i>region</i>                   | <i>Oesophageal adenocarcinoma</i> |      | <i>Colon</i> |       | <i>Rectum</i> |      | <i>Pancreas</i> |      | <i>Kidney</i> |      | <i>Total</i> |                          |                              |
|---------------------------------|-----------------------------------|------|--------------|-------|---------------|------|-----------------|------|---------------|------|--------------|--------------------------|------------------------------|
|                                 | PAF                               | N    | PAF          | N     | PAF           | N    | PAF             | N    | PAF           | N    | N            | PAF obesity <sup>a</sup> | PAF all cancers <sup>b</sup> |
| sub-Saharan Africa              | 5%                                | 37   | 1%           | 67    | 1%            | 32   | 1%              | 43   | 1%            | 22   | 201          | 1%                       | 0•1%                         |
| Middle East and Northern Africa | 13%                               | 152  | 6%           | 800   | 3%            | 240  | 4%              | 260  | 8%            | 444  | 1895         | 6%                       | 0•7%                         |
| Latin America & Caribbean       | 17%                               | 581  | 6%           | 1700  | 3%            | 476  | 4%              | 545  | 8%            | 960  | 4262         | 6%                       | 0•8%                         |
| North America                   | 19%                               | 1822 | 7%           | 4039  | 4%            | 947  | 5%              | 1182 | 8%            | 3016 | 11006        | 7%                       | 1•2%                         |
| East Asia                       | 1%                                | 49   | 1%           | 1160  | 0%            | 399  | 0%              | 270  | 1%            | 440  | 2318         | 1%                       | 0•1%                         |
| South-East Asia                 | 3%                                | 17   | 0%           | 83    | 0%            | 31   | 0%              | 14   | 1%            | 31   | 177          | 0%                       | 0•0%                         |
| South-Central Asia              | 2%                                | 62   | 1%           | 198   | 0%            | 43   | 0%              | 39   | 1%            | 89   | 432          | 1%                       | 0•1%                         |
| Eastern Europe                  | 5%                                | 79   | 2%           | 670   | 1%            | 267  | 1%              | 181  | 2%            | 455  | 1652         | 1%                       | 0•3%                         |
| Northern Europe                 | 17%                               | 873  | 6%           | 1204  | 3%            | 411  | 4%              | 254  | 7%            | 646  | 3388         | 6%                       | 1•3%                         |
| Southern Europe                 | 10%                               | 122  | 3%           | 1328  | 2%            | 351  | 2%              | 250  | 4%            | 601  | 2653         | 3%                       | 0•6%                         |
| Western Europe                  | 11%                               | 472  | 4%           | 1754  | 2%            | 562  | 2%              | 389  | 5%            | 1042 | 4219         | 4%                       | 0•7%                         |
| Oceania                         | 16%                               | 133  | 6%           | 409   | 3%            | 130  | 4%              | 77   | 8%            | 204  | 953          | 6%                       | 1•2%                         |
| Low HDI <sup>d</sup>            | 1%                                | 16   | 0%           | 34    | 0%            | 12   | 0%              | 10   | 0%            | 17   | 88           | 0%                       | 0•0%                         |
| Medium HDI <sup>d</sup>         | 1%                                | 107  | 0%           | 365   | 0%            | 113  | 0%              | 168  | 0%            | 190  | 944          | 0%                       | 0•0%                         |
| High HDI <sup>d</sup>           | 13%                               | 679  | 4%           | 2270  | 2%            | 705  | 2%              | 696  | 4%            | 1268 | 5617         | 3%                       | 0•6%                         |
| Very high HDI <sup>d</sup>      | 16%                               | 3596 | 5%           | 10744 | 2%            | 3060 | 3%              | 2630 | 6%            | 6475 | 26505        | 4%                       | 0•9%                         |
| World                           | 11%                               | 4399 | 3%           | 13413 | 1%            | 3889 | 2%              | 3503 | 4%            | 7951 | 33155        | 3%                       | 0•5%                         |

<sup>a</sup> PAF obesity: proportion of cancer attributable to obesity out of obesity-related cancers i.e. oesophageal adenocarcinoma, pancreas, kidney, postmenopausal breast, ovary, corpus uteri, gallbladder, colon, rectum

<sup>b</sup> PAF all cancers: proportion of cancer attributable to obesity out of total cancers excluding non-melanoma skin cancers

<sup>c</sup> HDI: Human development index



**FEMALES**

| region                          | Oesophageal adenocarcinoma |      | Colon |      | Rectum |      | Gallbladder |      | Pancreas |      | Breast (postmenopausal) |       | Corpus uteri |       | Ovary |      | Kidney |      | Total |                          |                              |
|---------------------------------|----------------------------|------|-------|------|--------|------|-------------|------|----------|------|-------------------------|-------|--------------|-------|-------|------|--------|------|-------|--------------------------|------------------------------|
|                                 | PAF                        | N    | PAF   | N    | PAF    | N    | PAF         | N    | PAF      | N    | PAF                     | N     | PAF          | N     | PAF   | N    | PAF    | N    | N     | PAF obesity <sup>a</sup> | PAF all cancers <sup>b</sup> |
| sub-Saharan Africa              | 4%                         | 21   | 1%    | 53   | 0%     | 19   | 3%          | 35   | 1%       | 37   | 1%                      | 566   | 5%           | 418   | 0%    | 40   | 2%     | 29   | 1216  | 1%                       | 0•4%                         |
| Middle East and Northern Africa | 14%                        | 56   | 3%    | 342  | 2%     | 91   | 19%         | 540  | 3%       | 144  | 4%                      | 2037  | 15%          | 1402  | 2%    | 184  | 11%    | 390  | 5185  | 6%                       | 2•1%                         |
| Latin America & Caribbean       | 15%                        | 187  | 3%    | 954  | 2%     | 204  | 21%         | 2109 | 3%       | 496  | 4%                      | 4382  | 17%          | 3339  | 2%    | 328  | 12%    | 904  | 12905 | 6%                       | 2•4%                         |
| North America                   | 20%                        | 293  | 4%    | 2242 | 2%     | 368  | 23%         | 1329 | 4%       | 973  | 5%                      | 11082 | 20%          | 10836 | 2%    | 570  | 14%    | 3213 | 30906 | 8%                       | 3•7%                         |
| East Asia                       | 8%                         | 213  | 1%    | 1312 | 1%     | 387  | 9%          | 3534 | 1%       | 551  | 2%                      | 2735  | 6%           | 5396  | 1%    | 280  | 4%     | 1311 | 15719 | 3%                       | 1•0%                         |
| South-East Asia                 | 6%                         | 14   | 1%    | 98   | 0%     | 25   | 4%          | 137  | 0%       | 22   | 1%                      | 442   | 3%           | 385   | 0%    | 54   | 2%     | 44   | 1222  | 1%                       | 0•3%                         |
| South-Central Asia              | 5%                         | 76   | 1%    | 128  | 0%     | 28   | 2%          | 255  | 0%       | 32   | 1%                      | 777   | 2%           | 469   | 0%    | 71   | 3%     | 121  | 1958  | 1%                       | 0•3%                         |
| Eastern Europe                  | 0%                         | 1    | 0%    | 14   | 0%     | 5    | 0%          | 25   | 0%       | 6    | 0%                      | 37    | 0%           | 49    | 0%    | 4    | 0%     | 14   | 157   | 0%                       | 0•0%                         |
| Northern Europe                 | 16%                        | 217  | 3%    | 537  | 1%     | 124  | 13%         | 183  | 3%       | 197  | 4%                      | 2351  | 14%          | 1857  | 2%    | 164  | 9%     | 521  | 6151  | 5%                       | 2•5%                         |
| Southern Europe                 | 4%                         | 10   | 1%    | 196  | 0%     | 42   | 3%          | 138  | 1%       | 66   | 1%                      | 556   | 3%           | 648   | 0%    | 44   | 2%     | 152  | 1853  | 1%                       | 0•6%                         |
| Western Europe                  | 7%                         | 66   | 1%    | 475  | 1%     | 110  | 7%          | 400  | 1%       | 194  | 2%                      | 1973  | 6%           | 1502  | 1%    | 100  | 4%     | 567  | 5386  | 2%                       | 1•1%                         |
| Oceania                         | 19%                        | 29   | 4%    | 243  | 2%     | 49   | 22%         | 100  | 4%       | 64   | 5%                      | 726   | 19%          | 577   | 2%    | 45   | 14%    | 189  | 2022  | 7%                       | 3•1%                         |
| Low HDI <sup>d</sup>            | 2%                         | 21   | 0%    | 43   | 0%     | 15   | 2%          | 160  | 1%       | 23   | 1%                      | 811   | 4%           | 417   | 0%    | 58   | 2%     | 44   | 1592  | 1%                       | 0•3%                         |
| Medium HDI <sup>d</sup>         | 7%                         | 268  | 1%    | 1137 | 1%     | 342  | 7%          | 3181 | 1%       | 507  | 1%                      | 3847  | 6%           | 6243  | 0%    | 393  | 4%     | 1248 | 17166 | 2%                       | 0•8%                         |
| High HDI <sup>d</sup>           | 11%                        | 220  | 1%    | 937  | 1%     | 232  | 13%         | 1627 | 2%       | 430  | 2%                      | 4304  | 6%           | 3336  | 1%    | 366  | 4%     | 891  | 12343 | 3%                       | 1•2%                         |
| Very high HDI <sup>d</sup>      | 14%                        | 674  | 2%    | 4478 | 1%     | 863  | 11%         | 3817 | 2%       | 1823 | 3%                      | 18701 | 12%          | 16882 | 1%    | 1067 | 8%     | 5273 | 53578 | 4%                       | 2•1%                         |
| World                           | 10%                        | 1184 | 2%    | 6596 | 1%     | 1453 | 9%          | 8785 | 2%       | 2783 | 2%                      | 27663 | 9%           | 26877 | 1%    | 1884 | 6%     | 7455 | 84679 | 3%                       | 1•3%                         |

<sup>a</sup> PAF obesity: proportion of cancer attributable to obesity out of obesity-related cancers i.e. oesophageal adenocarcinoma, pancreas, kidney, postmenopausal breast, ovary, corpus uteri, gallbladder, colon, rectum

<sup>b</sup> PAF all cancers: proportion of cancer attributable to obesity out of total cancers excluding non-melanoma skin cancers

<sup>c</sup> HDI: Human development index

xiii. Number of new cancer cases and proportion of the new cases attributable to excess body mass index by country and sex

**Table 13. Estimated population attributable fraction (PAF, % out of obesity-related cancers (PAF obesity) and total cancers (PAF all cancer)) and cancer cases (N) associated with excess BMI by country and cancer site in 2012, males.**

|                                        | Oesophageal adenocarcinoma |    | Colon |     | Rectum |    | Pancreas |     | Kidney |     | Total PAF obesity | PAF all cancer |      |
|----------------------------------------|----------------------------|----|-------|-----|--------|----|----------|-----|--------|-----|-------------------|----------------|------|
|                                        | PAF                        | N  | PAF   | N   | PAF    | N  | PAF      | N   | PAF    | N   |                   |                |      |
| <b>sub-Saharan Africa</b>              |                            |    |       |     |        |    |          |     |        |     |                   |                |      |
| Angola                                 | 10%                        | 1  | 4%    | 4   | 2%     | 1  | 2%       | 1   | 4%     | 1   | 10                | 3%             | 0•3% |
| Benin                                  | 12%                        | 0  | 4%    | 3   | 2%     | 1  | 3%       | 0   | 6%     | 2   | 6                 | 4%             | 0•4% |
| Botswana                               | 10%                        | 0  | 3%    | 0   | 2%     | 0  | 2%       | 0   | 4%     | 0   | 1                 | 4%             | 0•2% |
| Burkina Faso                           | 6%                         | 0  | 2%    | 1   | 1%     | 0  | 1%       | 0   | 3%     | 1   | 3                 | 2%             | 0•1% |
| Burundi                                | 9%                         | 2  | 3%    | 2   | 2%     | 1  | 2%       | 1   | 3%     | 0   | 5                 | 3%             | 0•2% |
| Cameroon                               | 21%                        | 1  | 8%    | 8   | 4%     | 3  | 5%       | 5   | 8%     | 1   | 17                | 6%             | 0•4% |
| Cape Verde                             | 15%                        | 0  | 6%    | 0   | 3%     | 0  | 0%       | 0   | 0%     | 0   | 0                 | 5%             | 0•3% |
| Central African Republic               | 6%                         | 0  | 2%    | 1   | 1%     | 0  | 1%       | 0   | 3%     | 0   | 2                 | 2%             | 0•2% |
| Chad                                   | 10%                        | 0  | 3%    | 2   | 1%     | 1  | 2%       | 1   | 4%     | 1   | 5                 | 2%             | 0•2% |
| Comoros                                | 12%                        | 0  | 5%    | 0   | 2%     | 0  | 0%       | 0   | 0%     | 0   | 0                 | 5%             | 0•2% |
| Congo                                  | 11%                        | 0  | 4%    | 2   | 2%     | 1  | 3%       | 0   | 4%     | 0   | 6                 | 1%             | 0•0% |
| Cote d'Ivoire                          | 14%                        | 1  | 5%    | 8   | 2%     | 3  | 3%       | 6   | 6%     | 1   | 3                 | 3%             | 0•3% |
| Democratic Republic of the Congo       | 3%                         | 1  | 1%    | 3   | 0%     | 1  | 0%       | 1   | 0%     | 0   | 19                | 4%             | 0•4% |
| Djibouti                               | 19%                        | 0  | 7%    | 1   | 3%     | 0  | 0%       | 0   | 9%     | 0   | 1                 | 6%             | 0•7% |
| Equatorial Guinea                      | 18%                        | 0  | 6%    | 0   | 3%     | 0  | 5%       | 0   | 0%     | 0   | 1                 | 5%             | 0•4% |
| Eritrea                                | 6%                         | 0  | 2%    | 1   | 1%     | 0  | 1%       | 0   | 2%     | 0   | 2                 | 2%             | 0•2% |
| Ethiopia                               | 2%                         | 0  | 1%    | 5   | 0%     | 2  | 0%       | 1   | 1%     | 2   | 11                | 0%             | 0•1% |
| Gabon                                  | 25%                        | 0  | 9%    | 2   | 4%     | 0  | 6%       | 0   | 12%    | 0   | 3                 | 8%             | 0•7% |
| Gambia                                 | 6%                         | 0  | 2%    | 0   | 1%     | 0  | 2%       | 0   | 0%     | 0   | 21                | 4%             | 0•4% |
| Ghana                                  | 14%                        | 0  | 5%    | 11  | 2%     | 4  | 3%       | 4   | 6%     | 2   | 3                 | 4%             | 0•1% |
| Guinea                                 | 14%                        | 0  | 5%    | 2   | 2%     | 1  | 4%       | 0   | 6%     | 0   | 1                 | 3%             | 0•2% |
| Guinea-Bissau                          | 9%                         | 0  | 3%    | 0   | 2%     | 0  | 2%       | 0   | 5%     | 0   | 37                | 3%             | 0•3% |
| Kenya                                  | 9%                         | 8  | 3%    | 13  | 2%     | 7  | 2%       | 5   | 4%     | 4   | 1                 | 4%             | 0•1% |
| Lesotho                                | 8%                         | 0  | 2%    | 0   | 1%     | 0  | 2%       | 0   | 4%     | 0   | 1                 | 3%             | 0•2% |
| Liberia                                | 11%                        | 0  | 4%    | 1   | 2%     | 0  | 3%       | 0   | 5%     | 0   | 15                | 2%             | 0•2% |
| Madagascar                             | 8%                         | 2  | 3%    | 6   | 1%     | 3  | 2%       | 2   | 3%     | 2   | 7                 | 4%             | 0•2% |
| Malawi                                 | 8%                         | 4  | 3%    | 1   | 2%     | 1  | 2%       | 0   | 4%     | 0   | 7                 | 2%             | 0•3% |
| Mali                                   | 8%                         | 0  | 3%    | 3   | 1%     | 1  | 2%       | 1   | 4%     | 2   | 2                 | 4%             | 0•4% |
| Mauritania                             | 14%                        | 0  | 5%    | 1   | 2%     | 0  | 4%       | 1   | 6%     | 0   | 19                | 9%             | 1•9% |
| Mauritius                              | 21%                        | 0  | 12%   | 8   | 6%     | 4  | 8%       | 3   | 14%    | 3   | 7                 | 3%             | 0•1% |
| Mozambique                             | 9%                         | 3  | 3%    | 1   | 2%     | 1  | 2%       | 2   | 0%     | 0   | 2                 | 4%             | 0•3% |
| Namibia                                | 14%                        | 0  | 5%    | 1   | 2%     | 0  | 3%       | 0   | 6%     | 1   | 6                 | 2%             | 0•3% |
| Niger                                  | 6%                         | 0  | 2%    | 2   | 1%     | 1  | 1%       | 1   | 3%     | 1   | 134               | 4%             | 0•4% |
| Nigeria                                | 16%                        | 1  | 6%    | 64  | 3%     | 21 | 4%       | 35  | 6%     | 13  | 7                 | 4%             | 0•2% |
| Rwanda                                 | 14%                        | 1  | 5%    | 2   | 2%     | 1  | 3%       | 2   | 5%     | 1   | 5                 | 3%             | 0•3% |
| Senegal                                | 12%                        | 0  | 4%    | 3   | 2%     | 1  | 3%       | 1   | 5%     | 1   | 2                 | 4%             | 0•3% |
| Sierra Leone                           | 11%                        | 0  | 4%    | 1   | 2%     | 0  | 3%       | 1   | 6%     | 0   | 9                 | 3%             | 0•4% |
| Somalia                                | 11%                        | 1  | 4%    | 4   | 2%     | 2  | 3%       | 1   | 5%     | 1   | 385               | 12%            | 1•1% |
| South Africa                           | 36%                        | 59 | 14%   | 129 | 7%     | 66 | 9%       | 88  | 17%    | 43  | 10                | 4%             | 0•3% |
| South Sudan                            | 12%                        | 2  | 4%    | 4   | 2%     | 2  | 3%       | 1   | 5%     | 1   | 1                 | 6%             | 0•2% |
| Swaziland                              | 17%                        | 0  | 6%    | 0   | 3%     | 0  | 4%       | 0   | 8%     | 0   | 27                | 5%             | 0•2% |
| Togo                                   | 10%                        | 0  | 3%    | 2   | 2%     | 0  | 2%       | 1   | 4%     | 0   | 0                 | 2%             | 0•1% |
| Uganda                                 | 13%                        | 10 | 5%    | 12  | 2%     | 5  | 3%       | 5   | 5%     | 3   | 3                 | 3%             | 0•3% |
| United Republic of Tanzania            | 14%                        | 10 | 5%    | 9   | 2%     | 5  | 3%       | 1   | 6%     | 2   | 35                | 4%             | 0•3% |
| Zambia                                 | 4%                         | 1  | 1%    | 1   | 1%     | 0  | 1%       | 0   | 2%     | 0   | 3                 | 1%             | 0•1% |
| Zimbabwe                               | 13%                        | 11 | 4%    | 5   | 2%     | 3  | 3%       | 1   | 5%     | 2   | 23                | 5%             | 0•4% |
| <b>Middle East and Northern Africa</b> |                            |    |       |     |        |    |          |     |        |     |                   |                |      |
| Algeria                                | 26%                        | 10 | 10%   | 98  | 5%     | 32 | 7%       | 20  | 13%    | 25  | 185               | 9%             | 1•3% |
| Armenia                                | 31%                        | 4  | 12%   | 34  | 6%     | 8  | 8%       | 17  | 15%    | 8   | 71                | 10%            | 1•3% |
| Azerbaijan                             | 32%                        | 25 | 13%   | 27  | 6%     | 7  | 8%       | 8   | 15%    | 14  | 81                | 14%            | 1•2% |
| Bahrain                                | 41%                        | 2  | 19%   | 7   | 10%    | 2  | 12%      | 1   | 19%    | 2   | 14                | 17%            | 3•3% |
| Egypt                                  | 40%                        | 64 | 17%   | 194 | 8%     | 54 | 11%      | 166 | 20%    | 187 | 665               | 15%            | 1•4% |
| Georgia                                | 32%                        | 3  | 13%   | 26  | 7%     | 6  | 8%       | 8   | 16%    | 19  | 63                | 12%            | 1•0% |
| Iraq                                   | 41%                        | 12 | 17%   | 66  | 9%     | 17 | 11%      | 27  | 20%    | 54  | 176               | 16%            | 1•8% |
| Israel                                 | 44%                        | 21 | 19%   | 289 | 10%    | 64 | 13%      | 56  | 23%    | 141 | 571               | 18%            | 3•9% |
| Jordan                                 | 46%                        | 3  | 20%   | 74  | 10%    | 19 | 13%      | 13  | 23%    | 18  | 127               | 17%            | 4•5% |
| Kuwait                                 | 44%                        | 1  | 21%   | 15  | 11%    | 4  | 13%      | 4   | 25%    | 5   | 30                | 18%            | 3•9% |
| Lebanon                                | 42%                        | 2  | 18%   | 48  | 9%     | 12 | 12%      | 8   | 21%    | 20  | 91                | 16%            | 2•2% |
| Libya                                  | 41%                        | 4  | 17%   | 34  | 9%     | 10 | 11%      | 15  | 20%    | 16  | 80                | 15%            | 2•7% |
| Morocco                                | 34%                        | 22 | 14%   | 108 | 7%     | 34 | 9%       | 31  | 16%    | 30  | 225               | 12%            | 1•4% |

|                                       |     |      |     |      |     |      |     |      |     |      |       |     |      |
|---------------------------------------|-----|------|-----|------|-----|------|-----|------|-----|------|-------|-----|------|
| Oman                                  | 42% | 3    | 18% | 19   | 9%  | 5    | 13% | 3    | 22% | 11   | 17    | 13% | 2•4% |
| Qatar                                 | 35% | 1    | 15% | 8    | 7%  | 2    | 9%  | 2    | 17% | 3    | 20    | 18% | 3•5% |
| Saudi Arabia                          | 44% | 1    | 19% | 9    | 10% | 2    | 12% | 2    | 22% | 6    | 290   | 18% | 4•0% |
| Sudan                                 | 45% | 17   | 20% | 148  | 10% | 38   | 13% | 28   | 23% | 58   | 39    | 17% | 2•8% |
| Syrian Arab Republic                  | 12% | 20   | 4%  | 14   | 2%  | 4    | 3%  | 3    | 5%  | 6    | 47    | 5%  | 0•6% |
| Tunisia                               | 43% | 11   | 18% | 148  | 9%  | 38   | 12% | 34   | 21% | 56   | 287   | 16% | 3•0% |
| Turkey                                | 31% | 3    | 13% | 45   | 6%  | 15   | 8%  | 11   | 15% | 19   | 94    | 11% | 1•5% |
| United Arab Emirates                  | 41% | 142  | 17% | 655  | 9%  | 244  | 11% | 228  | 20% | 434  | 1703  | 15% | 2•1% |
| West Bank and Gaza Strip              | 45% | 3    | 20% | 22   | 10% | 6    | 13% | 4    | 24% | 9    | 45    | 18% | 3•4% |
| Yemen                                 | 27% | 17   | 10% | 23   | 5%  | 6    | 7%  | 7    | 11% | 6    | 59    | 11% | 1•5% |
| <b>Latin America &amp; Caribbean</b>  |     |      |     |      |     |      |     |      |     |      |       |     |      |
| Argentina                             | 47% | 221  | 21% | 1069 | 11% | 194  | 14% | 267  | 24% | 616  | 2367  | 20% | 4•5% |
| Bahamas                               | 42% | 0    | 17% | 4    | 9%  | 1    | 12% | 1    | 22% | 2    | 8     | 16% | 2•3% |
| Barbados                              | 36% | 1    | 15% | 7    | 8%  | 1    | 10% | 1    | 19% | 1    | 11    | 14% | 2•0% |
| Belize                                | 37% | 0    | 16% | 1    | 8%  | 0    | 10% | 0    | 20% | 1    | 3     | 15% | 1•8% |
| Bolivia                               | 25% | 3    | 10% | 18   | 5%  | 5    | 6%  | 5    | 12% | 20   | 51    | 9%  | 1•3% |
| Brazil                                | 33% | 625  | 13% | 1266 | 7%  | 424  | 9%  | 408  | 16% | 565  | 3288  | 13% | 1•5% |
| Chile                                 | 42% | 33   | 18% | 172  | 9%  | 60   | 12% | 63   | 21% | 169  | 498   | 17% | 2•5% |
| Colombia                              | 30% | 64   | 12% | 175  | 6%  | 57   | 8%  | 56   | 14% | 80   | 432   | 11% | 1•3% |
| Costa Rica                            | 37% | 6    | 15% | 38   | 8%  | 11   | 10% | 11   | 19% | 20   | 86    | 14% | 2•0% |
| Cuba                                  | 28% | 40   | 10% | 115  | 5%  | 24   | 7%  | 29   | 13% | 42   | 251   | 10% | 1•1% |
| Dominican Republic                    | 27% | 5    | 11% | 34   | 5%  | 7    | 7%  | 10   | 13% | 5    | 61    | 10% | 0•9% |
| Ecuador                               | 32% | 7    | 13% | 55   | 7%  | 14   | 8%  | 19   | 16% | 33   | 128   | 12% | 1•3% |
| El Salvador                           | 34% | 5    | 14% | 17   | 7%  | 5    | 9%  | 8    | 17% | 8    | 43    | 13% | 1•3% |
| Guatemala                             | 29% | 6    | 12% | 14   | 6%  | 4    | 8%  | 7    | 14% | 10   | 42    | 11% | 0•8% |
| Guyana                                | 23% | 0    | 9%  | 1    | 4%  | 0    | 6%  | 0    | 11% | 1    | 4     | 8%  | 1•1% |
| Haiti                                 | 22% | 4    | 8%  | 10   | 4%  | 2    | 5%  | 5    | 11% | 2    | 23    | 8%  | 0•7% |
| Honduras                              | 28% | 3    | 12% | 12   | 6%  | 3    | 7%  | 6    | 14% | 6    | 29    | 10% | 1•1% |
| Jamaica                               | 21% | 3    | 8%  | 12   | 4%  | 2    | 5%  | 3    | 8%  | 1    | 20    | 7%  | 0•7% |
| Mexico                                | 42% | 79   | 18% | 509  | 9%  | 144  | 12% | 235  | 22% | 489  | 1457  | 17% | 2•5% |
| Nicaragua                             | 36% | 2    | 14% | 12   | 7%  | 3    | 9%  | 6    | 16% | 6    | 31    | 12% | 1•6% |
| Panama                                | 34% | 3    | 14% | 22   | 7%  | 6    | 9%  | 5    | 18% | 9    | 45    | 13% | 1•8% |
| Paraguay                              | 34% | 9    | 14% | 27   | 7%  | 8    | 9%  | 11   | 16% | 8    | 63    | 12% | 1•8% |
| Peru                                  | 29% | 16   | 11% | 90   | 6%  | 26   | 7%  | 42   | 14% | 77   | 251   | 10% | 1•5% |
| Puerto Rico                           | 44% | 11   | 19% | 103  | 10% | 22   | 12% | 18   | 23% | 38   | 192   | 17% | 3•2% |
| Suriname                              | 31% | 0    | 12% | 4    | 6%  | 1    | 8%  | 1    | 16% | 1    | 8     | 10% | 2•0% |
| Trinidad and Tobago                   | 38% | 1    | 16% | 23   | 8%  | 5    | 11% | 5    | 19% | 3    | 37    | 14% | 2•3% |
| Uruguay                               | 40% | 21   | 17% | 94   | 9%  | 24   | 11% | 25   | 20% | 60   | 222   | 16% | 3•3% |
| Venezuela                             | 39% | 23   | 17% | 151  | 9%  | 45   | 11% | 48   | 21% | 94   | 360   | 15% | 2•0% |
| <b>North America</b>                  |     |      |     |      |     |      |     |      |     |      |       |     |      |
| Canada                                | 46% | 409  | 20% | 1609 | 10% | 495  | 13% | 296  | 23% | 792  | 3601  | 19% | 3•8% |
| United States of America              | 44% | 3884 | 21% | 9843 | 11% | 2297 | 14% | 3094 | 25% | 9010 | 28128 | 21% | 3•5% |
| <b>East Asia</b>                      |     |      |     |      |     |      |     |      |     |      |       |     |      |
| China                                 | 18% | 1236 | 6%  | 5231 | 3%  | 2040 | 4%  | 1634 | 8%  | 3453 | 13594 | 6%  | 0•8% |
| Democratic People's Republic of Korea | 14% | 7    | 5%  | 93   | 2%  | 36   | 3%  | 23   | 6%  | 44   | 5779  | 6%  | 1•4% |
| Japan                                 | 20% | 127  | 7%  | 2936 | 4%  | 910  | 5%  | 813  | 9%  | 992  | 204   | 4%  | 0•8% |
| Mongolia                              | 30% | 2    | 11% | 3    | 6%  | 1    | 7%  | 3    | 13% | 3    | 1808  | 7%  | 1•6% |
| Republic of Korea                     | 21% | 16   | 8%  | 856  | 4%  | 398  | 5%  | 152  | 10% | 386  | 13    | 10% | 0•6% |
| <b>South-East Asia</b>                |     |      |     |      |     |      |     |      |     |      |       |     |      |
| Brunei Darussalam                     | 4%  | 0    | 10% | 3    | 5%  | 1    | 7%  | 0    | 13% | 0    | 4     | 8%  | 2•0% |
| Cambodia                              | 4%  | 0    | 1%  | 3    | 1%  | 1    | 1%  | 0    | 1%  | 1    | 6     | 1%  | 0•1% |
| Indonesia                             | 8%  | 5    | 3%  | 272  | 1%  | 85   | 2%  | 51   | 4%  | 69   | 481   | 2%  | 0•4% |
| Lao PDR                               | 7%  | 0    | 2%  | 2    | 1%  | 1    | 1%  | 0    | 3%  | 1    | 4     | 2%  | 0•1% |
| Malaysia                              | 27% | 33   | 10% | 148  | 5%  | 55   | 7%  | 23   | 13% | 49   | 308   | 9%  | 1•8% |
| Myanmar                               | 5%  | 5    | 2%  | 21   | 1%  | 7    | 1%  | 5    | 2%  | 5    | 43    | 2%  | 0•1% |
| Philippines                           | 15% | 23   | 6%  | 157  | 3%  | 48   | 4%  | 29   | 7%  | 42   | 300   | 5%  | 0•8% |
| Singapore                             | 24% | 3    | 9%  | 77   | 5%  | 29   | 6%  | 14   | 11% | 31   | 154   | 8%  | 2•0% |
| Thailand                              | 17% | 19   | 6%  | 245  | 3%  | 68   | 4%  | 39   | 8%  | 45   | 416   | 5%  | 0•7% |
| Timor-Leste                           | 6%  | 0    | 2%  | 1    | 1%  | 0    | 1%  | 0    | 2%  | 0    | 1     | 1%  | 0•2% |
| Viet Nam                              | 3%  | 3    | 1%  | 21   | 0%  | 6    | 1%  | 2    | 1%  | 5    | 37    | 1%  | 0•1% |
| <b>South-Central Asia</b>             |     |      |     |      |     |      |     |      |     |      |       |     |      |
| Afghanistan                           | 5%  | 4    | 1%  | 3    | 1%  | 1    | 1%  | 1    | 2%  | 3    | 12    | 2%  | 0•2% |
| Bangladesh                            | 3%  | 24   | 1%  | 9    | 0%  | 4    | 1%  | 3    | 1%  | 5    | 45    | 1%  | 0•1% |
| Bhutan                                | 15% | 0    | 5%  | 0    | 3%  | 0    | 4%  | 0    | 8%  | 0    | 1     | 5%  | 0•5% |
| India                                 | 7%  | 146  | 2%  | 373  | 1%  | 169  | 1%  | 95   | 3%  | 172  | 956   | 2%  | 0•2% |
| Iran (Islamic Republic of)            | 32% | 86   | 13% | 344  | 6%  | 57   | 8%  | 54   | 15% | 141  | 681   | 13% | 1•6% |
| Kazakhstan                            | 38% | 39   | 16% | 136  | 8%  | 63   | 10% | 63   | 18% | 51   | 353   | 13% | 2•0% |
| Kyrgyzstan                            | 30% | 3    | 11% | 8    | 6%  | 3    | 8%  | 7    | 14% | 7    | 29    | 10% | 1•1% |
| Maldives                              | 17% | 0    | 6%  | 0    | 3%  | 0    | 0%  | 0    | 0%  | 0    | 0     | 6%  | 0•4% |
| Nepal                                 | 5%  | 2    | 2%  | 3    | 1%  | 1    | 1%  | 1    | 2%  | 3    | 10    | 2%  | 0•1% |
| Pakistan                              | 14% | 33   | 5%  | 64   | 2%  | 29   | 3%  | 10   | 6%  | 56   | 193   | 5%  | 0•4% |
| Sri Lanka                             | 10% | 7    | 3%  | 7    | 2%  | 3    | 2%  | 2    | 4%  | 7    | 26    | 4%  | 0•3% |
| Tajikistan                            | 23% | 8    | 7%  | 5    | 4%  | 2    | 5%  | 2    | 10% | 4    | 22    | 9%  | 1•0% |
| Turkmenistan                          | 31% | 12   | 12% | 9    | 6%  | 4    | 8%  | 3    | 14% | 6    | 35    | 13% | 1•3% |
| Uzbekistan                            | 35% | 23   | 14% | 34   | 7%  | 16   | 9%  | 14   | 15% | 25   | 111   | 13% | 1•3% |
| <b>Eastern Europe</b>                 |     |      |     |      |     |      |     |      |     |      |       |     |      |
| Belarus                               | 37% | 18   | 15% | 138  | 8%  | 71   | 10% | 43   | 18% | 162  | 433   | 13% | 2•7% |

|                        |     |      |     |      |     |      |     |      |     |      |       |     |      |
|------------------------|-----|------|-----|------|-----|------|-----|------|-----|------|-------|-----|------|
| Bulgaria               | 40% | 22   | 17% | 246  | 8%  | 100  | 11% | 75   | 20% | 113  | 557   | 14% | 3•4% |
| Czech Republic         | 49% | 92   | 22% | 605  | 12% | 258  | 15% | 162  | 26% | 546  | 1663  | 20% | 5•5% |
| Hungary                | 43% | 41   | 19% | 461  | 10% | 217  | 12% | 112  | 22% | 220  | 1051  | 16% | 4•0% |
| Poland                 | 27% | 4    | 10% | 43   | 5%  | 20   | 7%  | 15   | 12% | 17   | 2527  | 15% | 3•3% |
| Republic of Moldova    | 42% | 62   | 18% | 1081 | 9%  | 451  | 12% | 300  | 21% | 632  | 99    | 9%  | 2•0% |
| Romania                | 34% | 42   | 14% | 421  | 7%  | 194  | 9%  | 155  | 16% | 203  | 1015  | 12% | 2•4% |
| Russian Federation     | 37% | 255  | 15% | 2273 | 8%  | 869  | 10% | 700  | 17% | 1871 | 5969  | 13% | 2•8% |
| Slovakia               | 42% | 12   | 18% | 223  | 9%  | 100  | 12% | 52   | 21% | 138  | 525   | 15% | 4•3% |
| Ukraine                | 33% | 89   | 13% | 590  | 7%  | 305  | 9%  | 215  | 16% | 481  | 1679  | 11% | 2•5% |
| <b>Northern Europe</b> |     |      |     |      |     |      |     |      |     |      |       |     |      |
| Denmark                | 37% | 63   | 16% | 227  | 8%  | 82   | 10% | 53   | 18% | 89   | 514   | 14% | 2•8% |
| Estonia                | 39% | 2    | 16% | 32   | 8%  | 13   | 10% | 10   | 19% | 31   | 88    | 14% | 2•8% |
| Finland                | 43% | 41   | 18% | 162  | 10% | 62   | 12% | 68   | 22% | 102  | 435   | 16% | 2•9% |
| Iceland                | 43% | 4    | 18% | 10   | 10% | 2    | 12% | 2    | 22% | 7    | 25    | 19% | 3•3% |
| Ireland                | 45% | 83   | 20% | 175  | 10% | 60   | 13% | 34   | 23% | 82   | 433   | 19% | 3•9% |
| Latvia                 | 40% | 6    | 17% | 47   | 9%  | 21   | 11% | 19   | 20% | 51   | 144   | 15% | 2•7% |
| Lithuania              | 42% | 10   | 18% | 68   | 9%  | 35   | 12% | 29   | 21% | 98   | 241   | 16% | 3•4% |
| Norway                 | 40% | 41   | 17% | 204  | 9%  | 65   | 11% | 41   | 20% | 102  | 454   | 16% | 2•9% |
| Sweden                 | 39% | 77   | 16% | 323  | 8%  | 108  | 11% | 53   | 19% | 130  | 691   | 15% | 2•5% |
| UK                     | 44% | 1933 | 19% | 2506 | 10% | 891  | 13% | 536  | 23% | 1350 | 7217  | 20% | 4•4% |
| <b>Southern Europe</b> |     |      |     |      |     |      |     |      |     |      |       |     |      |
| Albania                | 39% | 3    | 16% | 18   | 8%  | 5    | 11% | 13   | 19% | 28   | 67    | 15% | 1•9% |
| Bosnia and Herzegovina | 39% | 5    | 16% | 64   | 8%  | 19   | 11% | 16   | 19% | 33   | 135   | 14% | 2•7% |
| Croatia                | 41% | 13   | 17% | 162  | 9%  | 74   | 11% | 40   | 20% | 104  | 393   | 15% | 3•3% |
| Cyprus                 | 47% | 3    | 20% | 32   | 11% | 7    | 13% | 6    | 24% | 7    | 55    | 18% | 3•2% |
| Greece                 | 40% | 18   | 17% | 222  | 9%  | 65   | 11% | 93   | 20% | 141  | 86    | 13% | 2•3% |
| Italy                  | 41% | 164  | 17% | 3112 | 9%  | 714  | 11% | 563  | 20% | 1539 | 539   | 15% | 2•3% |
| Malta                  | 39% | 2    | 16% | 43   | 8%  | 12   | 11% | 19   | 19% | 10   | 6091  | 16% | 3•2% |
| Montenegro             | 47% | 4    | 20% | 19   | 10% | 6    | 13% | 6    | 24% | 9    | 43    | 18% | 4•4% |
| Portugal               | 39% | 1    | 17% | 16   | 9%  | 5    | 11% | 4    | 19% | 7    | 32    | 15% | 3•0% |
| Serbia                 | 41% | 50   | 18% | 511  | 9%  | 111  | 12% | 77   | 21% | 135  | 883   | 16% | 3•2% |
| Slovenia               | 41% | 18   | 17% | 278  | 9%  | 154  | 12% | 77   | 20% | 144  | 672   | 14% | 3•1% |
| Spain                  | 45% | 5    | 19% | 94   | 10% | 42   | 13% | 22   | 23% | 56   | 220   | 16% | 3•5% |
| FYR Macedonia          | 46% | 240  | 20% | 2433 | 10% | 715  | 13% | 444  | 23% | 994  | 4826  | 18% | 3•8% |
| <b>Western Europe</b>  |     |      |     |      |     |      |     |      |     |      |       |     |      |
| Austria                | 41% | 61   | 17% | 296  | 9%  | 93   | 12% | 90   | 20% | 166  | 706   | 16% | 3•2% |
| Belgium                | 43% | 151  | 18% | 552  | 10% | 165  | 12% | 82   | 22% | 244  | 1193  | 17% | 3•4% |
| France                 | 41% | 362  | 17% | 2247 | 9%  | 751  | 12% | 523  | 20% | 1457 | 5340  | 16% | 2•6% |
| Germany                | 46% | 817  | 20% | 4361 | 10% | 1495 | 13% | 1069 | 24% | 2654 | 10397 | 18% | 3•9% |
| Luxembourg             | 45% | 6    | 20% | 22   | 10% | 7    | 13% | 4    | 23% | 11   | 50    | 18% | 3•9% |
| Netherlands            | 39% | 430  | 16% | 757  | 8%  | 244  | 11% | 123  | 19% | 318  | 677   | 17% | 2•9% |
| Switzerland            | 43% | 84   | 18% | 301  | 9%  | 92   | 12% | 67   | 21% | 133  | 1872  | 16% | 3•9% |
| <b>Oceania</b>         |     |      |     |      |     |      |     |      |     |      |       |     |      |
| Australia              | 44% | 292  | 19% | 1015 | 10% | 335  | 13% | 198  | 23% | 510  | 2350  | 18% | 3•4% |
| Fiji                   | 36% | 1    | 15% | 2    | 8%  | 1    | 10% | 1    | 0%  | 0    | 5     | 13% | 1•5% |
| New Zealand            | 44% | 66   | 19% | 179  | 10% | 58   | 13% | 31   | 23% | 87   | 421   | 18% | 3•8% |
| Papua New Guinea       | 28% | 2    | 11% | 13   | 6%  | 4    | 7%  | 2    | 14% | 3    | 25    | 10% | 1•0% |
| Samoa                  | 0%  | 0    | 26% | 1    | 14% | 0    | 17% | 0    | 0%  | 0    | 1     | 20% | 2•4% |
| Solomon Islands        | 35% | 0    | 19% | 1    | 10% | 0    | 13% | 0    | 0%  | 0    | 2     | 15% | 1•3% |
| Vanuatu                | 0%  | 0    | 17% | 0    | 9%  | 0    | 12% | 0    | 0%  | 0    | 1     | 14% | 1•0% |

**Table 14. Estimated population attributable fraction (PAF, % out of obesity-related cancers (PAF obesity) and total cancers (PAF all cancer)) and cancer cases (N) associated with excess BMI by country and cancer site in 2012, females.**

|                                  | Oesophageal adenocarcinoma |    | Colon |     | Rectum |    | Gallbladder |    | Pancreas |     | Breast (postmenopausal) |     | Corpus uteri |     | Ovary |    | Kidney |    | Total N | PAF obesity | PAF all cancer |  |
|----------------------------------|----------------------------|----|-------|-----|--------|----|-------------|----|----------|-----|-------------------------|-----|--------------|-----|-------|----|--------|----|---------|-------------|----------------|--|
|                                  | PAF                        | N  | PAF   | N   | PAF    | N  | PAF         | N  | PAF      | N   | PAF                     | N   | PAF          | N   | PAF   | N  | PAF    | N  |         |             |                |  |
| <b>sub-Saharan Africa</b>        |                            |    |       |     |        |    |             |    |          |     |                         |     |              |     |       |    |        |    |         |             |                |  |
| Angola                           | 18%                        | 1  | 3%    | 4   | 2%     | 1  | 21%         | 2  | 3%       | 1   | 4%                      | 31  | 19%          | 27  | 2%    | 3  | 11%    | 4  | 75      | 6%          | 1•3%           |  |
| Benin                            | 25%                        | 0  | 4%    | 2   | 2%     | 1  | 30%         | 2  | 4%       | 1   | 6%                      | 26  | 24%          | 21  | 2%    | 2  | 15%    | 2  | 56      | 8%          | 2•1%           |  |
| Botswana                         | 39%                        | 1  | 8%    | 1   | 4%     | 0  | 46%         | 1  | 9%       | 1   | 11%                     | 11  | 38%          | 11  | 5%    | 1  | 28%    | 1  | 28      | 15%         | 3•7%           |  |
| Burkina Faso                     | 11%                        | 0  | 2%    | 1   | 1%     | 0  | 12%         | 0  | 2%       | 1   | 2%                      | 10  | 10%          | 9   | 1%    | 2  | 7%     | 1  | 24      | 3%          | 0•5%           |  |
| Burundi                          | 9%                         | 1  | 1%    | 1   | 1%     | 1  | 9%          | 0  | 2%       | 0   | 2%                      | 8   | 9%           | 7   | 1%    | 1  | 5%     | 1  | 19      | 2%          | 0•5%           |  |
| Cameroon                         | 27%                        | 0  | 6%    | 6   | 3%     | 2  | 0%          | 0  | 6%       | 1   | 7%                      | 59  | 29%          | 48  | 3%    | 10 | 17%    | 2  | 129     | 9%          | 1•8%           |  |
| Cape Verde                       | 0%                         | 0  | 6%    | 0   | 3%     | 0  | 0%          | 0  | 0%       | 0   | 7%                      | 2   | 30%          | 2   | 3%    | 0  | 0%     | 0  | 5       | 9%          | 2•5%           |  |
| Central African Republic         | 12%                        | 0  | 2%    | 1   | 1%     | 0  | 13%         | 0  | 2%       | 0   | 3%                      | 7   | 13%          | 5   | 1%    | 1  | 8%     | 1  | 15      | 4%          | 1•0%           |  |
| Chad                             | 11%                        | 0  | 2%    | 1   | 1%     | 0  | 13%         | 1  | 2%       | 0   | 3%                      | 13  | 11%          | 10  | 1%    | 2  | 7%     | 1  | 30      | 3%          | 1•0%           |  |
| Comoros                          | 13%                        | 0  | 3%    | 0   | 1%     | 0  | 0%          | 0  | 0%       | 0   | 3%                      | 1   | 13%          | 0   | 2%    | 0  | 0%     | 0  | 1       | 4%          | 0•5%           |  |
| Congo                            | 19%                        | 0  | 3%    | 1   | 2%     | 0  | 0%          | 0  | 4%       | 0   | 4%                      | 12  | 18%          | 5   | 2%    | 1  | 9%     | 0  | 127     | 3%          | 0•6%           |  |
| Cote d'Ivoire                    | 20%                        | 0  | 4%    | 7   | 2%     | 2  | 25%         | 19 | 4%       | 6   | 5%                      | 58  | 21%          | 47  | 3%    | 5  | 15%    | 3  | 20      | 5%          | 1•7%           |  |
| Democratic Republic of the Congo | 9%                         | 2  | 1%    | 8   | 1%     | 3  | 10%         | 1  | 2%       | 2   | 2%                      | 48  | 9%           | 54  | 1%    | 6  | 5%     | 4  | 148     | 7%          | 2•5%           |  |
| Djibouti                         | 28%                        | 0  | 5%    | 0   | 3%     | 0  | 33%         | 1  | 6%       | 0   | 7%                      | 4   | 28%          | 2   | 3%    | 1  | 18%    | 1  | 9       | 9%          | 2•7%           |  |
| Equatorial Guinea                | 26%                        | 0  | 4%    | 0   | 2%     | 0  | 0%          | 0  | 0%       | 0   | 6%                      | 2   | 23%          | 3   | 2%    | 0  | 0%     | 0  | 5       | 8%          | 2•0%           |  |
| Eritrea                          | 9%                         | 0  | 1%    | 0   | 1%     | 0  | 10%         | 2  | 2%       | 0   | 2%                      | 5   | 8%           | 3   | 1%    | 1  | 5%     | 1  | 12      | 2%          | 0•7%           |  |
| Ethiopia                         | 6%                         | 3  | 1%    | 5   | 0%     | 4  | 7%          | 31 | 1%       | 2   | 1%                      | 60  | 5%           | 29  | 0%    | 11 | 3%     | 18 | 163     | 2%          | 0•4%           |  |
| Gabon                            | 33%                        | 0  | 7%    | 1   | 3%     | 0  | 37%         | 1  | 8%       | 0   | 9%                      | 4   | 33%          | 13  | 4%    | 1  | 19%    | 0  | 21      | 15%         | 3•9%           |  |
| Gambia                           | 0%                         | 0  | 5%    | 0   | 2%     | 0  | 0%          | 0  | 5%       | 0   | 6%                      | 1   | 24%          | 1   | 3%    | 0  | 0%     | 0  | 169     | 8%          | 2•0%           |  |
| Ghana                            | 24%                        | 0  | 5%    | 6   | 2%     | 2  | 30%         | 11 | 5%       | 3   | 6%                      | 75  | 25%          | 60  | 3%    | 9  | 16%    | 3  | 24      | 5%          | 0•9%           |  |
| Guinea                           | 16%                        | 0  | 3%    | 1   | 1%     | 0  | 16%         | 0  | 3%       | 0   | 3%                      | 10  | 15%          | 11  | 2%    | 1  | 10%    | 1  | 6       | 5%          | 1•3%           |  |
| Guinea-Bissau                    | 0%                         | 0  | 3%    | 0   | 2%     | 0  | 0%          | 0  | 4%       | 0   | 5%                      | 3   | 19%          | 2   | 2%    | 0  | 0%     | 0  | 362     | 7%          | 1•7%           |  |
| Kenya                            | 19%                        | 13 | 4%    | 11  | 2%     | 8  | 22%         | 38 | 4%       | 11  | 5%                      | 130 | 20%          | 125 | 2%    | 15 | 13%    | 14 | 16      | 17%         | 2•3%           |  |
| Lesotho                          | 41%                        | 1  | 9%    | 0   | 4%     | 0  | 0%          | 0  | 9%       | 0   | 11%                     | 5   | 42%          | 7   | 5%    | 1  | 28%    | 1  | 18      | 7%          | 1•7%           |  |
| Liberia                          | 18%                        | 0  | 4%    | 1   | 2%     | 0  | 24%         | 2  | 4%       | 0   | 5%                      | 8   | 20%          | 7   | 2%    | 1  | 15%    | 0  | 41      | 2%          | 0•5%           |  |
| Madagascar                       | 7%                         | 1  | 1%    | 2   | 1%     | 1  | 9%          | 5  | 1%       | 2   | 2%                      | 15  | 7%           | 12  | 1%    | 1  | 4%     | 2  | 41      | 5%          | 0•5%           |  |
| Malawi                           | 15%                        | 6  | 3%    | 0   | 1%     | 1  | 0%          | 0  | 3%       | 0   | 4%                      | 15  | 17%          | 15  | 2%    | 2  | 10%    | 2  | 56      | 4%          | 1•1%           |  |
| Mali                             | 14%                        | 0  | 3%    | 4   | 1%     | 1  | 18%         | 2  | 3%       | 1   | 4%                      | 22  | 15%          | 20  | 2%    | 3  | 10%    | 3  | 30      | 12%         | 2•9%           |  |
| Mauritania                       | 38%                        | 0  | 7%    | 2   | 4%     | 1  | 44%         | 1  | 8%       | 1   | 10%                     | 14  | 36%          | 10  | 4%    | 2  | 21%    | 1  | 105     | 15%         | 7•4%           |  |
| Mauritius                        | 41%                        | 0  | 9%    | 4   | 4%     | 3  | 47%         | 5  | 9%       | 2   | 12%                     | 45  | 40%          | 38  | 5%    | 3  | 30%    | 4  | 90      | 7%          | 0•8%           |  |
| Mozambique                       | 18%                        | 4  | 4%    | 1   | 2%     | 1  | 21%         | 17 | 3%       | 7   | 5%                      | 35  | 17%          | 24  | 2%    | 1  | 0%     | 0  | 21      | 10%         | 3•2%           |  |
| Namibia                          | 32%                        | 0  | 6%    | 1   | 3%     | 0  | 0%          | 0  | 6%       | 0   | 8%                      | 10  | 32%          | 6   | 4%    | 1  | 20%    | 2  | 37      | 4%          | 1•3%           |  |
| Niger                            | 13%                        | 0  | 2%    | 2   | 1%     | 1  | 14%         | 2  | 2%       | 0   | 3%                      | 12  | 13%          | 14  | 1%    | 4  | 8%     | 2  | 1266    | 7%          | 2•2%           |  |
| Nigeria                          | 22%                        | 2  | 4%    | 47  | 2%     | 15 | 27%         | 24 | 4%       | 32  | 6%                      | 712 | 24%          | 366 | 2%    | 36 | 14%    | 31 | 24      | 3%          | 0•6%           |  |
| Rwanda                           | 9%                         | 0  | 2%    | 1   | 1%     | 1  | 12%         | 0  | 2%       | 1   | 2%                      | 5   | 9%           | 13  | 1%    | 2  | 8%     | 1  | 69      | 9%          | 1•8%           |  |
| Senegal                          | 21%                        | 0  | 5%    | 3   | 2%     | 1  | 33%         | 2  | 5%       | 1   | 8%                      | 30  | 28%          | 25  | 3%    | 4  | 16%    | 3  | 26      | 7%          | 1•7%           |  |
| Sierra Leone                     | 18%                        | 0  | 4%    | 1   | 2%     | 0  | 26%         | 2  | 4%       | 1   | 5%                      | 11  | 22%          | 8   | 2%    | 1  | 14%    | 1  | 70      | 6%          | 1•6%           |  |
| Somalia                          | 18%                        | 2  | 3%    | 2   | 2%     | 2  | 20%         | 9  | 3%       | 2   | 4%                      | 26  | 18%          | 19  | 2%    | 4  | 11%    | 5  | 2382    | 20%         | 6•4%           |  |
| South Africa                     | 52%                        | 85 | 13%   | 139 | 6%     | 52 | 58%         | 75 | 13%      | 112 | 16%                     | 981 | 52%          | 799 | 7%    | 83 | 37%    | 57 | 71      | 6%          | 1•6%           |  |
| South Sudan                      | 20%                        | 2  | 3%    | 2   | 2%     | 2  | 23%         | 6  | 4%       | 2   | 5%                      | 27  | 20%          | 22  | 2%    | 4  | 12%    | 4  | 14      | 24%         | 3•4%           |  |
| Swaziland                        | 49%                        | 0  | 11%   | 0   | 6%     | 0  | 0%          | 0  | 12%      | 0   | 15%                     | 4   | 48%          | 9   | 6%    | 1  | 0%     | 0  | 123     | 5%          | 0•7%           |  |
| Togo                             | 14%                        | 0  | 3%    | 1   | 1%     | 0  | 18%         | 1  | 3%       | 0   | 4%                      | 10  | 15%          | 11  | 2%    | 2  | 10%    | 1  | 2       | 7%          | 1•1%           |  |
| Uganda                           | 12%                        | 4  | 2%    | 5   | 1%     | 3  | 14%         | 2  | 2%       | 3   | 3%                      | 38  | 14%          | 40  | 1%    | 8  | 8%     | 7  | 26      | 5%          | 1•3%           |  |
| United Republic of Tanzania      | 17%                        | 6  | 3%    | 10  | 2%     | 7  | 20%         | 1  | 3%       | 0   | 4%                      | 61  | 18%          | 32  | 2%    | 5  | 9%     | 0  | 111     | 4%          | 0•8%           |  |
| Zambia                           | 19%                        | 2  | 3%    | 2   | 2%     | 1  | 12%         | 2  | 4%       | 2   | 5%                      | 22  | 20%          | 21  | 2%    | 3  | 12%    | 2  | 57      | 6%          | 1•1%           |  |
| Zimbabwe                         | 34%                        | 14 | 7%    | 10  | 3%     | 7  | 38%         | 10 | 7%       | 15  | 9%                      | 73  | 33%          | 129 | 4%    | 10 | 9%     | 1  | 267     | 13%         | 3•3%           |  |

**Middle East and Northern Africa**

|                          |     |    |     |     |    |     |     |     |     |     |     |      |     |      |    |     |     |     |      |     |       |
|--------------------------|-----|----|-----|-----|----|-----|-----|-----|-----|-----|-----|------|-----|------|----|-----|-----|-----|------|-----|-------|
| Algeria                  | 36% | 2  | 8%  | 77  | 4% | 27  | 44% | 253 | 9%  | 16  | 11% | 402  | 38% | 82   | 5% | 36  | 27% | 37  | 932  | 13% | 4•8%  |
| Armenia                  | 47% | 2  | 11% | 34  | 5% | 7   | 53% | 8   | 11% | 23  | 13% | 171  | 41% | 246  | 6% | 11  | 34% | 7   | 510  | 18% | 9•5%  |
| Azerbaijan               | 45% | 12 | 10% | 23  | 5% | 5   | 52% | 12  | 10% | 9   | 14% | 109  | 46% | 70   | 6% | 7   | 24% | 8   | 255  | 16% | 4•0%  |
| Bahrain                  | 50% | 0  | 11% | 3   | 6% | 1   | 56% | 2   | 11% | 1   | 14% | 12   | 48% | 7    | 7% | 1   | 35% | 2   | 29   | 17% | 7•1%  |
| Egypt                    | 54% | 54 | 13% | 135 | 7% | 41  | 60% | 270 | 13% | 115 | 17% | 1963 | 53% | 746  | 8% | 181 | 39% | 209 | 3715 | 20% | 7•2%  |
| Georgia                  | 39% | 1  | 9%  | 18  | 4% | 4   | 47% | 7   | 9%  | 7   | 11% | 126  | 37% | 159  | 5% | 7   | 28% | 11  | 340  | 16% | 5•6%  |
| Iraq                     | 49% | 6  | 11% | 49  | 6% | 10  | 55% | 48  | 12% | 25  | 15% | 360  | 48% | 67   | 6% | 27  | 35% | 67  | 659  | 16% | 5•3%  |
| Israel                   | 49% | 7  | 12% | 156 | 6% | 29  | 55% | 47  | 12% | 49  | 14% | 457  | 47% | 393  | 7% | 25  | 34% | 119 | 1281 | 18% | 9•5%  |
| Jordan                   | 57% | 1  | 13% | 37  | 7% | 8   | 61% | 34  | 14% | 9   | 18% | 130  | 54% | 51   | 8% | 8   | 40% | 13  | 290  | 20% | 9•8%  |
| Kuwait                   | 59% | 0  | 14% | 7   | 7% | 2   | 60% | 5   | 15% | 2   | 19% | 34   | 56% | 23   | 9% | 2   | 43% | 3   | 77   | 22% | 10•6% |
| Lebanon                  | 48% | 1  | 12% | 28  | 6% | 6   | 57% | 26  | 12% | 8   | 15% | 189  | 49% | 91   | 7% | 12  | 35% | 13  | 372  | 18% | 8•2%  |
| Libya                    | 47% | 0  | 12% | 31  | 6% | 6   | 58% | 45  | 14% | 11  | 17% | 48   | 54% | 43   | 7% | 9   | 39% | 14  | 207  | 20% | 7•7%  |
| Morocco                  | 39% | 7  | 8%  | 55  | 4% | 17  | 46% | 116 | 9%  | 18  | 11% | 380  | 35% | 158  | 5% | 34  | 26% | 40  | 824  | 13% | 4•9%  |
| Oman                     | 54% | 1  | 12% | 14  | 6% | 3   | 57% | 25  | 14% | 5   | 17% | 42   | 50% | 43   | 7% | 4   | 35% | 6   | 33   | 15% | 5•5%  |
| Qatar                    | 39% | 0  | 9%  | 3   | 4% | 1   | 42% | 2   | 8%  | 1   | 12% | 12   | 40% | 9    | 5% | 1   | 28% | 3   | 25   | 19% | 7•3%  |
| Saudi Arabia             | 50% | 0  | 11% | 3   | 6% | 1   | 57% | 2   | 13% | 0   | 16% | 9    | 49% | 6    | 7% | 1   | 36% | 2   | 742  | 23% | 9•2%  |
| Sudan                    | 52% | 6  | 13% | 75  | 6% | 16  | 59% | 119 | 13% | 21  | 17% | 216  | 53% | 225  | 7% | 19  | 38% | 46  | 143  | 21% | 9•3%  |
| Syrian Arab Republic     | 19% | 13 | 3%  | 7   | 2% | 2   | 23% | 15  | 4%  | 3   | 5%  | 76   | 20% | 48   | 2% | 14  | 12% | 12  | 189  | 6%  | 2•0%  |
| Tunisia                  | 53% | 4  | 12% | 86  | 6% | 18  | 58% | 82  | 13% | 25  | 16% | 391  | 51% | 120  | 7% | 24  | 37% | 51  | 802  | 18% | 7•7%  |
| Turkey                   | 47% | 2  | 11% | 36  | 6% | 12  | 54% | 77  | 11% | 9   | 14% | 141  | 48% | 88   | 7% | 15  | 34% | 31  | 410  | 18% | 8•1%  |
| United Arab Emirates     | 50% | 40 | 12% | 359 | 6% | 115 | 58% | 298 | 13% | 145 | 16% | 1360 | 51% | 1910 | 7% | 164 | 36% | 552 | 4942 | 22% | 8•5%  |
| West Bank and Gaza Strip | 51% | 1  | 13% | 7   | 7% | 2   | 58% | 5   | 12% | 2   | 17% | 32   | 53% | 21   | 8% | 5   | 38% | 6   | 81   | 19% | 6•3%  |
| Yemen                    | 39% | 13 | 8%  | 11  | 4% | 2   | 46% | 5   | 9%  | 10  | 11% | 101  | 36% | 3    | 5% | 11  | 29% | 4   | 161  | 10% | 3•3%  |

**Latin America & Caribbean**

|                     |     |     |     |     |    |     |     |      |     |     |     |      |     |      |    |     |     |     |       |     |       |
|---------------------|-----|-----|-----|-----|----|-----|-----|------|-----|-----|-----|------|-----|------|----|-----|-----|-----|-------|-----|-------|
| Argentina           | 48% | 79  | 11% | 529 | 6% | 75  | 53% | 596  | 11% | 229 | 14% | 2108 | 46% | 1007 | 6% | 133 | 33% | 452 | 5208  | 17% | 8•9%  |
| Bahamas             | 54% | 0   | 13% | 4   | 6% | 1   | 60% | 2    | 13% | 1   | 16% | 19   | 53% | 16   | 7% | 1   | 0%  | 0   | 43    | 20% | 9•2%  |
| Barbados            | 47% | 0   | 12% | 6   | 6% | 1   | 57% | 2    | 12% | 1   | 15% | 24   | 51% | 38   | 8% | 1   | 34% | 1   | 75    | 23% | 12•7% |
| Belize              | 53% | 0   | 12% | 1   | 6% | 0   | 52% | 1    | 12% | 1   | 15% | 5    | 52% | 6    | 8% | 0   | 36% | 1   | 15    | 22% | 9•3%  |
| Bolivia             | 38% | 1   | 9%  | 20  | 4% | 5   | 45% | 193  | 8%  | 8   | 11% | 48   | 40% | 61   | 5% | 13  | 27% | 19  | 369   | 21% | 5•8%  |
| Brazil              | 39% | 273 | 8%  | 843 | 4% | 250 | 44% | 1127 | 8%  | 430 | 11% | 4883 | 37% | 2327 | 5% | 258 | 26% | 585 | 10976 | 13% | 5•4%  |
| Chile               | 46% | 18  | 10% | 137 | 5% | 27  | 52% | 833  | 10% | 66  | 13% | 405  | 46% | 299  | 6% | 44  | 33% | 177 | 2006  | 22% | 10•3% |
| Colombia            | 41% | 22  | 9%  | 156 | 5% | 43  | 47% | 398  | 9%  | 82  | 12% | 709  | 40% | 341  | 5% | 69  | 28% | 105 | 1924  | 15% | 5•5%  |
| Costa Rica          | 44% | 2   | 10% | 27  | 5% | 6   | 49% | 30   | 10% | 10  | 13% | 104  | 43% | 78   | 6% | 7   | 31% | 20  | 284   | 16% | 6•9%  |
| Cuba                | 40% | 16  | 9%  | 140 | 4% | 24  | 45% | 68   | 9%  | 39  | 11% | 388  | 39% | 486  | 5% | 26  | 28% | 48  | 1235  | 15% | 7•4%  |
| Dominican Republic  | 40% | 5   | 8%  | 31  | 4% | 5   | 43% | 11   | 8%  | 12  | 11% | 109  | 40% | 72   | 5% | 4   | 27% | 1   | 249   | 13% | 3•7%  |
| Ecuador             | 41% | 6   | 9%  | 50  | 4% | 10  | 47% | 193  | 9%  | 20  | 12% | 173  | 42% | 105  | 5% | 18  | 28% | 46  | 622   | 17% | 5•4%  |
| El Salvador         | 39% | 2   | 9%  | 19  | 4% | 4   | 47% | 36   | 9%  | 13  | 12% | 48   | 43% | 208  | 6% | 6   | 28% | 14  | 352   | 23% | 6•9%  |
| Guatemala           | 38% | 5   | 8%  | 13  | 4% | 3   | 44% | 41   | 8%  | 11  | 11% | 37   | 40% | 321  | 5% | 5   | 26% | 16  | 451   | 25% | 6•4%  |
| Guyana              | 38% | 0   | 9%  | 2   | 5% | 0   | 47% | 3    | 9%  | 1   | 12% | 12   | 42% | 27   | 5% | 1   | 28% | 1   | 47    | 20% | 7•5%  |
| Haiti               | 14% | 2   | 3%  | 6   | 1% | 1   | 24% | 9    | 3%  | 2   | 4%  | 18   | 19% | 22   | 2% | 2   | 10% | 3   | 64    | 6%  | 1•6%  |
| Honduras            | 36% | 1   | 8%  | 11  | 4% | 2   | 43% | 26   | 8%  | 8   | 11% | 34   | 40% | 150  | 5% | 3   | 25% | 8   | 243   | 21% | 6•2%  |
| Jamaica             | 38% | 1   | 9%  | 13  | 4% | 2   | 45% | 10   | 8%  | 5   | 11% | 60   | 40% | 70   | 5% | 4   | 28% | 4   | 169   | 16% | 6•5%  |
| Mexico              | 48% | 35  | 11% | 298 | 6% | 65  | 55% | 760  | 11% | 256 | 15% | 1858 | 48% | 1296 | 7% | 190 | 35% | 484 | 5242  | 20% | 6•8%  |
| Nicaragua           | 42% | 0   | 10% | 12  | 5% | 3   | 48% | 30   | 9%  | 8   | 13% | 45   | 43% | 27   | 6% | 2   | 30% | 6   | 133   | 17% | 5•0%  |
| Panama              | 41% | 1   | 10% | 13  | 5% | 3   | 50% | 5    | 10% | 5   | 12% | 62   | 44% | 60   | 6% | 6   | 32% | 6   | 161   | 16% | 6•1%  |
| Paraguay            | 38% | 3   | 8%  | 15  | 4% | 4   | 43% | 24   | 8%  | 10  | 10% | 71   | 35% | 55   | 4% | 6   | 25% | 6   | 194   | 13% | 4•8%  |
| Peru                | 38% | 8   | 8%  | 92  | 4% | 23  | 45% | 347  | 8%  | 58  | 11% | 239  | 39% | 194  | 5% | 30  | 27% | 88  | 1080  | 16% | 4•7%  |
| Puerto Rico         | 54% | 5   | 13% | 68  | 7% | 11  | 60% | 27   | 13% | 18  | 17% | 217  | 53% | 241  | 8% | 10  | 40% | 39  | 636   | 23% | 11•6% |
| Suriname            | 45% | 0   | 10% | 2   | 5% | 1   | 51% | 1    | 10% | 1   | 14% | 11   | 38% | 4    | 6% | 1   | 33% | 1   | 22    | 14% | 5•2%  |
| Trinidad and Tobago | 0%  | 0   | 10% | 11  | 5% | 2   | 52% | 5    | 10% | 4   | 13% | 41   | 45% | 57   | 6% | 5   | 31% | 4   | 128   | 18% | 8•6%  |
| Uruguay             | 44% | 11  | 10% | 61  | 5% | 11  | 49% | 65   | 10% | 23  | 12% | 178  | 43% | 115  | 6% | 12  | 30% | 49  | 525   | 16% | 8•5%  |
| Venezuela           | 45% | 9   | 10% | 92  | 5% | 23  | 51% | 87   | 10% | 55  | 14% | 496  | 45% | 338  | 6% | 39  | 33% | 85  | 1223  | 17% | 5•8%  |

|                                       |     |     |     |      |    |     |     |      |     |      |     |       |     |       |    |      |     |      |       |     |       |  |
|---------------------------------------|-----|-----|-----|------|----|-----|-----|------|-----|------|-----|-------|-----|-------|----|------|-----|------|-------|-----|-------|--|
| <b>North America</b>                  |     |     |     |      |    |     |     |      |     |      |     |       |     |       |    |      |     |      |       |     |       |  |
| Canada                                | 44% | 69  | 10% | 723  | 5% | 141 | 49% | 304  | 10% | 221  | 12% | 2333  | 43% | 2133  | 6% | 150  | 31% | 644  | 6719  | 16% | 7•9%  |  |
| United States of America              | 49% | 637 | 11% | 5329 | 6% | 867 | 54% | 2827 | 11% | 2405 | 15% | 27408 | 48% | 23948 | 7% | 1404 | 35% | 7440 | 72266 | 20% | 9•5%  |  |
| <b>East Asia</b>                      |     |     |     |      |    |     |     |      |     |      |     |       |     |       |    |      |     |      |       |     |       |  |
| China                                 | 22% | 537 | 4%  | 2556 | 2% | 812 | 25% | 6935 | 4%  | 1053 | 5%  | 5576  | 20% | 14460 | 2% | 732  | 14% | 2982 | 35643 | 9%  | 3•0%  |  |
| Democratic People's Republic of Korea | 13% | 3   | 2%  | 44   | 1% | 13  | 15% | 64   | 2%  | 18   | 3%  | 91    | 12% | 90    | 1% | 13   | 8%  | 44   | 9356  | 7%  | 3•2%  |  |
| Japan                                 | 20% | 34  | 4%  | 1256 | 2% | 251 | 24% | 2538 | 4%  | 599  | 5%  | 1891  | 17% | 1905  | 2% | 158  | 13% | 723  | 380   | 4%  | 1•3%  |  |
| Mongolia                              | 39% | 3   | 8%  | 3    | 4% | 1   | 43% | 2    | 8%  | 4    | 11% | 6     | 35% | 7     | 5% | 2    | 25% | 9    | 2778  | 8%  | 2•8%  |  |
| Republic of Korea                     | 25% | 5   | 5%  | 370  | 2% | 150 | 30% | 746  | 5%  | 123  | 7%  | 579   | 23% | 458   | 3% | 59   | 17% | 287  | 36    | 13% | 1•9%  |  |
| <b>South-East Asia</b>                |     |     |     |      |    |     |     |      |     |      |     |       |     |       |    |      |     |      |       |     |       |  |
| Brunei Darussalam                     | 0%  | 0   | 4%  | 1    | 2% | 0   | 28% | 0    | 4%  | 0    | 6%  | 3     | 19% | 5     | 2% | 0    | 14% | 0    | 10    | 8%  | 3•7%  |  |
| Cambodia                              | 11% | 0   | 2%  | 5    | 1% | 1   | 13% | 16   | 2%  | 1    | 2%  | 17    | 10% | 16    | 1% | 3    | 7%  | 2    | 61    | 4%  | 0•8%  |  |
| Indonesia                             | 15% | 5   | 3%  | 225  | 1% | 56  | 18% | 141  | 3%  | 76   | 4%  | 1175  | 18% | 1183  | 2% | 188  | 12% | 117  | 3165  | 5%  | 2•1%  |  |
| Lao PDR                               | 13% | 0   | 2%  | 2    | 1% | 1   | 16% | 11   | 2%  | 0    | 3%  | 7     | 13% | 10    | 1% | 1    | 8%  | 1    | 35    | 5%  | 1•3%  |  |
| Malaysia                              | 35% | 21  | 7%  | 84   | 3% | 24  | 38% | 51   | 7%  | 17   | 9%  | 294   | 34% | 237   | 4% | 42   | 23% | 40   | 810   | 11% | 4•5%  |  |
| Myanmar                               | 14% | 6   | 2%  | 27   | 1% | 7   | 17% | 140  | 2%  | 9    | 3%  | 96    | 14% | 80    | 1% | 17   | 9%  | 14   | 395   | 5%  | 1•3%  |  |
| Philippines                           | 22% | 10  | 4%  | 100  | 2% | 27  | 25% | 47   | 4%  | 33   | 6%  | 559   | 22% | 455   | 2% | 48   | 14% | 47   | 1325  | 7%  | 2•6%  |  |
| Singapore                             | 26% | 1   | 5%  | 42   | 3% | 10  | 32% | 23   | 5%  | 9    | 7%  | 118   | 25% | 131   | 3% | 10   | 18% | 23   | 367   | 9%  | 4•9%  |  |
| Thailand                              | 27% | 10  | 5%  | 182  | 3% | 43  | 31% | 377  | 5%  | 50   | 8%  | 612   | 29% | 539   | 3% | 83   | 19% | 64   | 1960  | 10% | 3•3%  |  |
| Timor-Leste                           | 11% | 0   | 2%  | 0    | 1% | 0   | 14% | 1    | 2%  | 0    | 3%  | 2     | 11% | 4     | 1% | 0    | 7%  | 0    | 7     | 4%  | 1•5%  |  |
| Viet Nam                              | 5%  | 1   | 1%  | 28   | 0% | 7   | 8%  | 13   | 1%  | 3    | 1%  | 76    | 7%  | 181   | 1% | 7    | 4%  | 14   | 330   | 2%  | 0•6%  |  |
| <b>South-Central Asia</b>             |     |     |     |      |    |     |     |      |     |      |     |       |     |       |    |      |     |      |       |     |       |  |
| Afghanistan                           | 9%  | 3   | 1%  | 2    | 1% | 1   | 10% | 8    | 1%  | 1    | 2%  | 27    | 7%  | 50    | 1% | 2    | 5%  | 3    | 96    | 3%  | 1•1%  |  |
| Bangladesh                            | 3%  | 9   | 0%  | 3    | 0% | 1   | 4%  | 124  | 0%  | 1    | 0%  | 25    | 3%  | 29    | 0% | 7    | 2%  | 4    | 204   | 1%  | 0•4%  |  |
| Bhutan                                | 15% | 0   | 2%  | 0    | 1% | 0   | 16% | 1    | 3%  | 0    | 4%  | 0     | 0%  | 0     | 2% | 0    | 8%  | 0    | 2     | 5%  | 1•1%  |  |
| India                                 | 11% | 77  | 2%  | 234  | 1% | 107 | 13% | 1478 | 2%  | 101  | 3%  | 2136  | 12% | 1425  | 1% | 287  | 7%  | 181  | 6026  | 4%  | 1•2%  |  |
| Iran (Islamic Republic of)            | 41% | 103 | 9%  | 211  | 4% | 35  | 46% | 197  | 9%  | 44   | 12% | 583   | 40% | 310   | 5% | 76   | 28% | 165  | 1724  | 14% | 4•7%  |  |
| Kazakhstan                            | 45% | 23  | 10% | 99   | 5% | 45  | 49% | 11   | 10% | 52   | 13% | 560   | 39% | 479   | 5% | 45   | 30% | 50   | 1364  | 15% | 6•6%  |  |
| Kyrgyzstan                            | 42% | 2   | 9%  | 8    | 4% | 3   | 48% | 13   | 9%  | 7    | 11% | 45    | 35% | 69    | 4% | 6    | 23% | 7    | 160   | 15% | 5•5%  |  |
| Maldives                              | 49% | 0   | 10% | 0    | 5% | 0   | 0%  | 0    | 0%  | 0    | 13% | 3     | 45% | 1     | 5% | 0    | 0%  | 0    | 5     | 13% | 5•1%  |  |
| Nepal                                 | 5%  | 1   | 1%  | 1    | 0% | 1   | 6%  | 36   | 1%  | 1    | 1%  | 9     | 5%  | 5     | 1% | 3    | 3%  | 2    | 59    | 2%  | 0•6%  |  |
| Pakistan                              | 23% | 37  | 4%  | 40   | 2% | 18  | 28% | 355  | 5%  | 11   | 6%  | 968   | 24% | 494   | 3% | 86   | 16% | 75   | 2084  | 8%  | 2•7%  |  |
| Sri Lanka                             | 21% | 10  | 4%  | 9    | 2% | 4   | 23% | 17   | 4%  | 3    | 5%  | 147   | 21% | 44    | 2% | 15   | 13% | 8    | 257   | 6%  | 2•0%  |  |
| Tajikistan                            | 28% | 4   | 5%  | 2    | 2% | 1   | 32% | 1    | 5%  | 2    | 7%  | 20    | 22% | 71    | 3% | 1    | 18% | 3    | 106   | 13% | 4•1%  |  |
| Turkmenistan                          | 30% | 7   | 5%  | 5    | 3% | 2   | 36% | 1    | 6%  | 2    | 8%  | 23    | 26% | 38    | 3% | 2    | 20% | 5    | 85    | 11% | 3•0%  |  |
| Uzbekistan                            | 37% | 13  | 8%  | 20   | 4% | 9   | 42% | 7    | 8%  | 13   | 10% | 190   | 30% | 226   | 4% | 8    | 24% | 23   | 510   | 14% | 4•4%  |  |
| <b>Eastern Europe</b>                 |     |     |     |      |    |     |     |      |     |      |     |       |     |       |    |      |     |      |       |     |       |  |
| Belarus                               | 42% | 5   | 9%  | 107  | 5% | 43  | 47% | 66   | 9%  | 34   | 12% | 348   | 42% | 597   | 5% | 45   | 28% | 177  | 1422  | 17% | 9•2%  |  |
| Bulgaria                              | 44% | 6   | 9%  | 126  | 5% | 41  | 49% | 87   | 10% | 52   | 12% | 374   | 41% | 522   | 5% | 46   | 29% | 85   | 1339  | 16% | 8•8%  |  |
| Czech Republic                        | 52% | 19  | 13% | 253  | 6% | 81  | 58% | 374  | 13% | 132  | 15% | 885   | 49% | 923   | 7% | 75   | 37% | 440  | 3182  | 21% | 12•0% |  |
| Hungary                               | 46% | 12  | 10% | 222  | 5% | 80  | 52% | 214  | 11% | 100  | 13% | 546   | 44% | 348   | 6% | 58   | 31% | 164  | 1743  | 15% | 7•5%  |  |
| Poland                                | 46% | 1   | 11% | 45   | 6% | 16  | 54% | 15   | 11% | 24   | 14% | 129   | 44% | 153   | 6% | 11   | 34% | 30   | 7419  | 19% | 10•1% |  |
| Republic of Moldova                   | 48% | 20  | 11% | 543  | 6% | 173 | 53% | 894  | 11% | 269  | 13% | 1926  | 44% | 2623  | 6% | 260  | 33% | 711  | 424   | 17% | 9•0%  |  |
| Romania                               | 40% | 13  | 9%  | 224  | 4% | 80  | 46% | 171  | 9%  | 121  | 11% | 781   | 39% | 593   | 5% | 89   | 27% | 181  | 2254  | 13% | 6•5%  |  |
| Russian Federation                    | 49% | 113 | 11% | 2461 | 6% | 637 | 55% | 1194 | 11% | 831  | 14% | 6643  | 47% | 9832  | 6% | 828  | 34% | 2829 | 25367 | 19% | 10•7% |  |
| Slovakia                              | 42% | 3   | 9%  | 89   | 5% | 29  | 47% | 123  | 9%  | 40   | 12% | 256   | 42% | 386   | 5% | 28   | 29% | 119  | 1073  | 17% | 9•5%  |  |
| Ukraine                               | 40% | 37  | 9%  | 473  | 4% | 191 | 46% | 312  | 9%  | 192  | 11% | 1449  | 40% | 2769  | 5% | 200  | 28% | 580  | 6203  | 16% | 8•9%  |  |
| <b>Northern Europe</b>                |     |     |     |      |    |     |     |      |     |      |     |       |     |       |    |      |     |      |       |     |       |  |
| Denmark                               | 36% | 18  | 8%  | 113  | 4% | 26  | 41% | 59   | 8%  | 39   | 9%  | 419   | 35% | 266   | 4% | 24   | 25% | 64   | 1029  | 12% | 6•0%  |  |
| Estonia                               | 38% | 0   | 8%  | 22   | 4% | 6   | 45% | 12   | 8%  | 8    | 10% | 54    | 36% | 75    | 5% | 7    | 26% | 30   | 214   | 14% | 7•6%  |  |
| Finland                               | 44% | 11  | 10% | 83   | 5% | 22  | 49% | 75   | 10% | 59   | 12% | 452   | 42% | 363   | 6% | 25   | 30% | 121  | 1210  | 16% | 9•3%  |  |
| Iceland                               | 42% | 1   | 9%  | 5    | 4% | 1   | 48% | 2    | 9%  | 1    | 11% | 20    | 40% | 12    | 5% | 1    | 29% | 4    | 48    | 14% | 7•1%  |  |

|                        |     |     |     |      |    |     |     |      |     |     |     |      |     |      |     |     |     |      |       |     |       |
|------------------------|-----|-----|-----|------|----|-----|-----|------|-----|-----|-----|------|-----|------|-----|-----|-----|------|-------|-----|-------|
| Ireland                | 42% | 19  | 9%  | 68   | 5% | 16  | 48% | 45   | 9%  | 24  | 12% | 254  | 41% | 153  | 6%  | 21  | 29% | 62   | 660   | 14% | 7•1%  |
| Latvia                 | 45% | 3   | 10% | 38   | 5% | 12  | 51% | 21   | 10% | 20  | 12% | 116  | 42% | 164  | 5%  | 16  | 31% | 58   | 448   | 17% | 9•2%  |
| Lithuania              | 49% | 3   | 11% | 49   | 6% | 19  | 55% | 35   | 11% | 26  | 14% | 163  | 45% | 257  | 6%  | 22  | 34% | 103  | 677   | 19% | 9•5%  |
| Norway                 | 38% | 9   | 8%  | 109  | 4% | 22  | 43% | 36   | 8%  | 30  | 10% | 233  | 37% | 281  | 5%  | 19  | 26% | 73   | 813   | 13% | 6•7%  |
| Sweden                 | 38% | 17  | 8%  | 165  | 4% | 37  | 43% | 100  | 8%  | 39  | 10% | 532  | 37% | 525  | 5%  | 30  | 26% | 110  | 1556  | 13% | 7•0%  |
| UK                     | 44% | 498 | 10% | 1177 | 5% | 279 | 50% | 272  | 10% | 450 | 12% | 5269 | 43% | 3612 | 6%  | 379 | 31% | 1101 | 13037 | 15% | 8•2%  |
| <b>Southern Europe</b> |     |     |     |      |    |     |     |      |     |     |     |      |     |      |     |     |     |      |       |     |       |
| Albania                | 41% | 1   | 8%  | 9    | 4% | 2   | 46% | 4    | 9%  | 6   | 11% | 59   | 38% | 82   | 5%  | 3   | 27% | 20   | 187   | 17% | 5•5%  |
| Bosnia and Herzegovina | 47% | 2   | 10% | 34   | 5% | 8   | 52% | 47   | 11% | 12  | 13% | 118  | 45% | 143  | 6%  | 14  | 30% | 35   | 413   | 18% | 9•0%  |
| Croatia                | 43% | 4   | 9%  | 73   | 5% | 28  | 48% | 107  | 9%  | 31  | 12% | 263  | 41% | 243  | 5%  | 22  | 29% | 86   | 857   | 16% | 8•2%  |
| Cyprus                 | 50% | 1   | 11% | 17   | 6% | 3   | 54% | 9    | 12% | 4   | 14% | 60   | 46% | 42   | 6%  | 3   | 32% | 4    | 144   | 17% | 9•1%  |
| Greece                 | 43% | 4   | 9%  | 110  | 5% | 26  | 47% | 94   | 9%  | 65  | 11% | 453  | 40% | 343  | 5%  | 45  | 29% | 106  | 319   | 16% | 9•4%  |
| Italy                  | 41% | 38  | 9%  | 1320 | 4% | 246 | 46% | 1052 | 9%  | 509 | 11% | 4263 | 38% | 3178 | 5%  | 278 | 28% | 989  | 1246  | 14% | 7•2%  |
| Malta                  | 38% | 0   | 8%  | 20   | 4% | 5   | 44% | 11   | 8%  | 7   | 10% | 91   | 37% | 165  | 5%  | 7   | 26% | 12   | 11874 | 14% | 7•4%  |
| Montenegro             | 51% | 0   | 12% | 9    | 6% | 2   | 56% | 3    | 12% | 4   | 15% | 38   | 49% | 31   | 7%  | 3   | 34% | 7    | 98    | 18% | 11•2% |
| Portugal               | 39% | 0   | 8%  | 6    | 4% | 1   | 44% | 7    | 8%  | 2   | 11% | 19   | 37% | 27   | 5%  | 2   | 26% | 6    | 70    | 15% | 7•2%  |
| Serbia                 | 46% | 8   | 10% | 216  | 5% | 39  | 51% | 98   | 11% | 59  | 13% | 576  | 45% | 672  | 6%  | 36  | 32% | 108  | 1811  | 17% | 8•9%  |
| Slovenia               | 44% | 5   | 10% | 111  | 5% | 50  | 51% | 129  | 10% | 60  | 13% | 560  | 42% | 611  | 5%  | 49  | 31% | 122  | 1697  | 17% | 8•8%  |
| Spain                  | 43% | 1   | 10% | 38   | 5% | 14  | 48% | 61   | 10% | 20  | 12% | 126  | 43% | 131  | 6%  | 11  | 30% | 43   | 445   | 17% | 8•9%  |
| FYR Macedonia          | 48% | 44  | 11% | 979  | 6% | 222 | 54% | 572  | 11% | 343 | 14% | 2470 | 46% | 2344 | 6%  | 200 | 33% | 692  | 7868  | 17% | 9•2%  |
| <b>Western Europe</b>  |     |     |     |      |    |     |     |      |     |     |     |      |     |      |     |     |     |      |       |     |       |
| Austria                | 42% | 10  | 9%  | 124  | 5% | 30  | 47% | 99   | 9%  | 74  | 11% | 470  | 40% | 360  | 5%  | 33  | 29% | 143  | 1343  | 15% | 7•3%  |
| Belgium                | 43% | 34  | 9%  | 243  | 5% | 55  | 48% | 97   | 9%  | 58  | 11% | 922  | 41% | 618  | 5%  | 44  | 29% | 180  | 2250  | 14% | 7•8%  |
| France                 | 39% | 104 | 8%  | 1035 | 4% | 248 | 45% | 605  | 8%  | 382 | 10% | 4300 | 38% | 2585 | 5%  | 215 | 26% | 931  | 10405 | 13% | 6•6%  |
| Germany                | 45% | 151 | 10% | 1810 | 5% | 430 | 51% | 1616 | 10% | 877 | 12% | 7273 | 43% | 4813 | 6%  | 387 | 30% | 2190 | 19549 | 16% | 8•9%  |
| Luxembourg             | 46% | 1   | 11% | 9    | 5% | 2   | 48% | 1    | 11% | 4   | 13% | 35   | 45% | 52   | 6%  | 2   | 31% | 6    | 113   | 19% | 9•8%  |
| Netherlands            | 41% | 98  | 9%  | 380  | 4% | 86  | 46% | 135  | 9%  | 90  | 11% | 1150 | 39% | 789  | 5%  | 50  | 28% | 268  | 1148  | 12% | 6•3%  |
| Switzerland            | 37% | 17  | 8%  | 106  | 4% | 24  | 42% | 77   | 8%  | 49  | 9%  | 432  | 35% | 345  | 4%  | 27  | 25% | 73   | 3046  | 13% | 7•0%  |
| <b>Oceania</b>         |     |     |     |      |    |     |     |      |     |     |     |      |     |      |     |     |     |      |       |     |       |
| Australia              | 44% | 53  | 10% | 481  | 5% | 101 | 50% | 184  | 10% | 132 | 13% | 1412 | 43% | 972  | 6%  | 81  | 31% | 365  | 3782  | 15% | 7•4%  |
| Fiji                   | 0%  | 0   | 11% | 2    | 6% | 0   | 58% | 1    | 12% | 1   | 15% | 21   | 47% | 22   | 7%  | 3   | 37% | 1    | 52    | 19% | 7•1%  |
| New Zealand            | 44% | 12  | 10% | 101  | 5% | 19  | 49% | 32   | 10% | 24  | 12% | 266  | 43% | 211  | 6%  | 17  | 31% | 60   | 743   | 15% | 7•6%  |
| Papua New Guinea       | 34% | 3   | 6%  | 5    | 3% | 1   | 33% | 5    | 6%  | 1   | 8%  | 30   | 32% | 66   | 4%  | 6   | 20% | 1    | 118   | 13% | 2•9%  |
| Samoa                  | 56% | 0   | 16% | 0    | 8% | 0   | 0%  | 0    | 0%  | 0   | 20% | 2    | 61% | 3    | 10% | 0   | 0%  | 0    | 6     | 28% | 8•2%  |
| Solomon Islands        | 0%  | 0   | 11% | 1    | 6% | 0   | 0%  | 0    | 0%  | 0   | 14% | 6    | 45% | 8    | 6%  | 1   | 0%  | 0    | 16    | 19% | 6•5%  |
| Vanuatu                | 0%  | 0   | 11% | 0    | 6% | 0   | 0%  | 0    | 0%  | 0   | 14% | 2    | 43% | 3    | 6%  | 0   | 0%  | 0    | 6     | 20% | 6•7%  |



## References

1. Finucane MM, Stevens GA, Cowan MJ, et al. National, regional, and global trends in body-mass index since 1980: systematic analysis of health examination surveys and epidemiological studies with 960 country-years and 9.1 million participants. *Lancet* 2011; **377**(9765): 557-67.
2. Stevens GA, Singh GM, Lu Y, et al. National, regional, and global trends in adult overweight and obesity prevalences. *Popul Health Metr* 2012; **10**(1): 22.
3. Razak F, Corsi DJ, Subramanian SV. Change in the body mass index distribution for women: analysis of surveys from 37 low- and middle-income countries. *PLoS medicine* 2013; **10**(1): e1001367.
4. Food, Nutrition, Physical activity, and the Prevention of Ovarian Cancer. Continuous Update Project Report.: World Cancer Research Fund / American Institute for Cancer Research, 2014.
5. Food, Nutrition, Physical activity, and the Prevention of Endometrial Cancer. Continuous Update Project Report.: World Cancer Research Fund / American Institute for Cancer Research, 2013.
6. Food, Nutrition, Physical activity, and the Prevention of Breast Cancer. Continuous Update Project Report.: World Cancer Research Fund / American Institute for Cancer Research, 2010.
7. Food, Nutrition, Physical activity, and the Prevention of Pancreatic Cancer. Continuous Update Project Report.: World Cancer Research Fund / American Institute for Cancer Research, 2012.
8. Food, Nutrition, Physical activity, and the Prevention of Colorectal Cancer. Continuous Update Project Report.: World Cancer Research Fund / American Institute for Cancer Research, 2011.
9. Renehan AG, Tyson M, Egger M, Heller RF, Zwahlen M. Body-mass index and incidence of cancer: a systematic review and meta-analysis of prospective observational studies. *Lancet* 2008; **371**(9612): 569-78.
10. Renehan AG. Obesity and cancer in Asia-Pacific populations. *Lancet Oncol* 2010; **11**(8): 704-5.
11. Ferlay J, Soerjomataram I, Ervik M, et al. GLOBOCAN 2012 v1.0, Cancer Incidence and Mortality Worldwide: IARC CancerBase No. 11. Lyon, France: International Agency for Research on Cancer; 2013.
12. Forman D BF, Brewster DH, Gombe Mbalawa C, Kohler B, Piñeros M, Steliarova-Foucher E, Swaminathan R, Ferlay J. Cancer Incidence in Five Continents, Vol. X (electronic version). Lyon: IARC; 2013.

13. Arnold M, Soerjomataram I, Ferlay J, Forman D. Global incidence of oesophageal cancer by histological subtype in 2012. *GUT* 2014.
14. Lim SS, Vos T, Flaxman AD, et al. A comparative risk assessment of burden of disease and injury attributable to 67 risk factors and risk factor clusters in 21 regions, 1990-2010: a systematic analysis for the Global Burden of Disease Study 2010. *Lancet* 2012; **380**(9859): 2224-60.
15. Hanley JA. A heuristic approach to the formulas for population attributable fraction. *J Epidemiol Community Health* 2001; **55**(7): 508-14.
16. American Institute for Cancer Research., World Cancer Research Fund. Food, nutrition, physical activity and the prevention of cancer : a global perspective : a project of World Cancer Research Fund International. Washington, D.C.: American Institute for Cancer Research; 2007.
17. Amadou A, Ferrari P, Muwonge R, et al. Overweight, obesity and risk of premenopausal breast cancer according to ethnicity: a systematic review and dose-response meta-analysis. *Obes Rev* 2013.
18. Jiao L, Berrington de Gonzalez A, Hartge P, et al. Body mass index, effect modifiers, and risk of pancreatic cancer: a pooled study of seven prospective cohorts. *Cancer Causes Control* 2010; **21**(8): 1305-14.
19. Renehan AG, Soerjomataram I, Leitzmann MF. Interpreting the epidemiological evidence linking obesity and cancer: A framework for population-attributable risk estimations in Europe. *Eur J Cancer* 2010; **46**(14): 2581-92.
20. Genkinger JM, Spiegelman D, Anderson KE, et al. A pooled analysis of 14 cohort studies of anthropometric factors and pancreatic cancer risk. *Int J Cancer* 2011; **129**(7): 1708-17.
21. Ezzati M, Hoorn SV, Lopez AD, et al. Comparative Quantification of Mortality and Burden of Disease Attributable to Selected Risk Factors. In: Lopez AD, Mathers CD, Ezzati M, Jamison DT, Murray CJL, eds. Global Burden of Disease and Risk Factors. Washington (DC): World Bank; 2006.
22. Kumle M. Declining breast cancer incidence and decreased HRT use. *Lancet* 2008; **372**(9639): 608-10.
23. Beral V, Hermon C, Peto R, et al. Ovarian cancer and body size: individual participant meta-analysis including 25,157 women with ovarian cancer from 47 epidemiological studies. *PLoS medicine* 2012; **9**(4): e1001200.
24. Larsson SC, Wolk A. Body mass index and risk of non-Hodgkin's and Hodgkin's lymphoma: a meta-analysis of prospective studies. *Eur J Cancer* 2011; **47**(16): 2422-30.
25. Danaei G, Vander Hoorn S, Lopez AD, Murray CJ, Ezzati M, (Cancers) CRAcg. Causes of cancer in the world: comparative risk assessment of nine behavioural and environmental risk factors. *Lancet* 2005; **366**(9499): 1784-93.
